1           **The nucleoid as a scaffold for the assembly of bacterial signaling complexes**  
2  
3

4       Audrey Moine<sup>1</sup>, Leon Espinosa<sup>1</sup>, Eugenie Martineau<sup>1</sup>, Mutum Yaikhomba<sup>2</sup>, P J Jazleena<sup>2</sup>,  
5       Deborah Byrne<sup>3</sup>, Emanuele G. Biondi<sup>1</sup>, Eugenio Notomista<sup>4</sup>, Matteo Brilli<sup>5</sup>, Virginie Molle<sup>6</sup>,  
6           Pananghat Gayathri<sup>2</sup>, Tâm Mignot<sup>1\*</sup> and Emilia M.F. Mauriello<sup>1\*</sup>  
7

8       <sup>1</sup>*Laboratoire de Chimie Bactérienne, CNRS-Université Aix-Marseille, Marseille, France;*

9       <sup>2</sup>*Biology Division, Indian Institute of Science Education and Research, Pune, India;*

10       <sup>3</sup>*Protein Purification Platform, Institut de Microbiologie de la Méditerranée, CNRS,*  
11       *Marseille, France;* <sup>4</sup>*Dipartimento di Biologia, Università degli Studi di Napoli “Federico II”,*

12       *Naples, Italy;* <sup>5</sup>*Centre for Research and Innovation, Fondazione Edmund Mach Trento, Italy;*

13       <sup>6</sup>*Laboratoire de Dynamique des Interactions Membranaires Normales et Pathologiques,*

14           *CNRS-Universités de Montpellier II et I, Montpellier, France.*  
15  
16

17       \*Correspondence to:

18       Emilia M.F. Mauriello

19       Laboratoire de Chimie Bactérienne,

20       CNRS-Université Aix-Marseille

21       31 Chemin Joseph Aiguier, Marseille 13402, France

22       Tel. +33491164321

23       Email : [emauiello@imm.cnrs.fr](mailto:emauiello@imm.cnrs.fr)  
24

25       Tâm Mignot

26       Laboratoire de Chimie Bactérienne,

27       CNRS-Université Aix-Marseille

28       31 Chemin Joseph Aiguier, Marseille 13402, France

29       Tel. +33491164348

30       Email: [tmignot@imm.cnrs.fr](mailto:tmignot@imm.cnrs.fr)  
31

32       **Running Title: The *Myxococcus xanthus* FrzCD cytoplasmic chemoreceptor binds DNA**  
33       **to enhance the signaling activity of Che-like clusters**

1 **ABSTRACT**

2 The FrzCD chemoreceptor from the gliding bacterium *Myxococcus xanthus* forms  
3 cytoplasmic clusters that occupy a large central region of the cell body also occupied by the  
4 nucleoid. In this work, we show that FrzCD directly binds to the nucleoid with its N-terminal  
5 positively charged tail and recruits active signaling complexes at this location. The FrzCD  
6 binding to the DNA leads to the formation of multiple distributed clusters that explore  
7 constrained areas. This supra-molecular organization is required for cooperative interactions  
8 between clustered receptors, in turn important for the modulation of bacterial social  
9 behaviors.

10

## 1 INTRODUCTION

2 The bacterial cytoplasm is not a homogeneous solution of macromolecules, but rather a  
3 highly organized and compartmentalized space where the clustering and segregation of  
4 macromolecular complexes at certain cell regions confers functional efficiency (Typas and  
5 Sourjik, 2015). Bacterial chemoreceptors represent a versatile model system to study the  
6 subcellular localization of macromolecules, as they are universally present in prokaryotes  
7 where they form highly ordered arrays that occupy different positions in cells.  
8 Chemoreceptors, also called Methyl-accepting Chemotaxis Proteins (MCP), are capable of  
9 transducing external signals to downstream signaling pathways where phospho-cascades,  
10 initiating at the level of histine kinases CheAs and culminating at the level of output response  
11 regulators CheYs, translate the initial signal into cell behaviors such as regulation of motility,  
12 cell development or aggregation (Sourjik and Berg, 2002; Berleman and Bauer, 2005; Bible *et*  
13 *al.*, 2012). A common feature of the MCPs is their ability to form highly ordered hexagonal  
14 structures, which, by cryoelectron tomography, look like lattices with each unit composed of  
15 an MCP trimer of dimers, two CheW docking proteins and one CheA dimer (Studdert and  
16 Parkinson, 2005; Li *et al.*, 2011; Briegel *et al.*, 2012a; Liu *et al.*, 2012). Receptor clustering is  
17 not strictly required for signal transduction, as one functional unit is enough to generate  
18 phosphorylated CheY (Francis *et al.*, 2002; Li *et al.*, 2011; Li and Hazelbauer, 2011; Piñas *et*  
19 *al.*, 2016). However, MCP clustering is essential to ensure the amplification of the initial  
20 signal, which is a direct consequence of the cooperative interactions between clustered  
21 chemoreceptors (Sourjik and Berg, 2004; Ames and Parkinson, 2006; Li and Hazelbauer,  
22 2014; Piñas *et al.*, 2016; Frank *et al.*, 2016).

23 While the MCP lattices have been described as universal among prokaryotes (Briegel *et al.*,  
24 2015) their subcellular localization and distribution can vary among different bacterial  
25 species, often reflecting life style complexity, behaviors and functions. For example,

1 *Escherichia coli* MCPs localize in one or two polar clusters and more lateral clusters appear  
2 as cells become longer (Thiem and Sourjik, 2008). Differently, the TlpT cytoplasmic  
3 chemoreceptor from *Rhodobacter sphaeroides* forms a cluster positioned at the center of cells  
4 or two clusters positioned at the two and three cell quarters (Thompson *et al.*, 2006). The  
5 determinants of these different localization patterns also vary. In *E. coli*, membrane-anchored  
6 MCPs form clusters stochastically and through a self-assembly mechanism (Thiem and  
7 Sourjik, 2008). The TlpA *Bacillus subtilis* polar chemoreceptor recognizes and associates  
8 with strongly curved membrane regions generated during cell septation. These regions  
9 become the new poles after cell division, which explains the TlpA polar localization (Strahl *et*  
10 *al.*, 2015). While in *E. coli* and *B. subtilis* the polar targeting of bacterial chemoreceptors is  
11 due to intrinsic properties of these proteins, in *Vibrio* species the Che proteins are recruited to  
12 the cell poles by a set of specialized proteins responsible of the general maturation of these  
13 cell regions (Ringgaard *et al.*, 2011; Ringgaard *et al.*, 2014). The presence of CheWs and  
14 CheAs also seem to be universally important in chemoreceptor cluster formation (Sourjik and  
15 Berg, 2000; Martin *et al.*, 2001).

16 *Myxococcus xanthus* is a gliding bacterium that uses the Frz chemosensory system to  
17 modulate the frequency at which cells periodically reverse the direction of their movement on  
18 solid surfaces to reorient in the environment, analogously to controlled tumbles in *E. coli*  
19 (Blackhart and Zusman, 1985). The Frz regulation of directionality in *M. xanthus* is essential  
20 to achieve fruiting body formation, a behavior that bacteria initiate when they are exposed to  
21 unfavorable growth conditions. In the Frz pathway, the FrzCD chemoreceptor activates the  
22 autophosphorylation of a CheA-CheY fusion, FrzE, which in turn phosphorylates the  
23 response regulator FrzZ (Guzzo *et al.*, 2015). The system also possesses two CheW  
24 homologues (FrzA and FrzB), a methyltransferase (FrzF) and methylesterase (FrzG). The  
25 chemoreceptor of the Frz pathway, FrzCD, lacks the transmembrane and periplasmic

1 domains, which are replaced by a N-terminal domain of unknown function (Bustamante *et al.*,  
2 2004). When FrzCD was first localized in cells, it appeared organized in multiple dynamic  
3 cytoplasm clusters that aligned when cells made side-to-side contacts, which has been  
4 proposed to be part of a signaling process that synchronizes cell reversals (Mauriello, Astling,  
5 *et al.*, 2009). However the determinants of FrzCD localization and its exact link with the  
6 regulation of the cell reversal are still unclear.

7 In this work we show that FrzCD forms cytoplasmic signaling clusters by directly binding to  
8 the nucleoid. Analogously to membrane chemotaxis clusters in *E. coli*, nucleoid binding and  
9 cluster formation confer to the Frz system important regulatory properties such as signal  
10 amplification. We propose that the nucleoid functions as a scaffold for the formation of  
11 bacterial chemosensory complexes like the membrane for enteric chemosensory systems.

## 1 RESULTS

### 2 The Frz chemosensory system co-localizes with the nucleoid of different bacterial species

3 Fluorescence microscopy has shown that a FrzCD-GFP fusion appears as multiple distributed  
4 clusters co-localizing with the nucleoid in *M. xanthus* cells (Figure 1A, 1B and Figure 1-  
5 figure supplement 1) (Mauriello, Astling, *et al.*, 2009; Moine *et al.*, 2014; Kaimer and  
6 Zusman, 2016). It has been also shown that an inducible FrzE-YFP fusion colocalizes with  
7 FrzCD at the nucleoid (Kaimer and Zusman, 2016). To further analyze the co-localization of  
8 FrzCD and FrzE with the nucleoid, we first constructed a strain expressing a *frzE-mcherry*  
9 fusion that replaced the *frzE* locus and is, thus, expressed under its endogenous promoter. The  
10 chimeric protein was functional (Figure 1-figure supplement 2) and formed clusters very  
11 similar to that of FrzCD and also co-localizing with the *M. xanthus* nucleoid (Figure 1A, 1B  
12 and Figure 1-figure supplement 1).

13 To directly show that the nucleoid supports Frz protein localization, we constructed a *M.*  
14 *xanthus* conditional mutant that lacked ParB, a protein important for nucleoid segregation  
15 whose absence causes the presence of anucleated cells, cells with abnormal nucleoid  
16 condensation and cells where the division septum is improperly positioned over the nucleoid  
17 (“guillotines”) (Harms *et al.*, 2013; Iniesta, 2014). When *frzCD-gfp* and *frzE-mCherry* were  
18 expressed in the *parB* mutant, we observed that both FrzCD and FrzE clusters always co-  
19 localized with the nucleoid and cells lacking the nucleoid also lacked Frz clusters. Similarly,  
20 in cells with “guillotines”, septa formed in regions occupied by both the nucleoid and Frz  
21 clusters instead than in DNA-free regions (Figure 1E).

22 As a control, we looked at the cellular localization of another chemoreceptor fusion, DifA-  
23 GFP, in the absence of *parB*. DifA has been recently shown to form membrane bound and  
24 uniformly distributed clusters (Moine *et al.*, 2014). In the absence of *parB*, even cells without  
25 nucleoid still carried DifA-GFP clusters and these clusters localized similar to the wild type

1 (Moine *et al.*, 2014) (Figure 1E). These results confirmed that nucleoid-mediated cluster  
2 formation is a specific feature of Frz proteins.

3 To test if FrzCD and FrzE were capable of associating with the nucleoid independently of  
4 each other, we expressed *frzE-mcherry* in a strain lacking *frzCD* and *frzCD-gfp* in a strain  
5 lacking *frzE* (Mauriello *et al.*, 2009 and this study). As previously shown, in the absence of  
6 FrzCD, FrzE-mCherry was homogeneously dispersed in the cytoplasm, and notably also in  
7 the polar regions (Figure 1A, 1B and Figure 1-figure supplement 1) (Mauriello, Astling, *et al.*,  
8 2009; Kaimer and Zusman, 2016). Here we additionally showed that in the absence of *frzE*,  
9 FrzCD was no longer capable to form clusters, but the fluorescent signal was still retained  
10 towards the center of the cell body and strictly co-localized with the nucleoid (Figure 1A-D  
11 and Figure 1-figure supplement 1). The aberrant localization patterns observed in the deletion  
12 mutants were not due to a change in protein levels (Figure 1-figure supplement 3). Thus, this  
13 result confirms that both FrzCD and FrzE are important for cluster formation, whereas FrzCD  
14 is responsible for the recruitment of FrzE to the nucleoid.

15 To check whether the association between FrzCD and the nucleoid was *M. xanthus*-specific,  
16 we constructed an *E. coli* strain expressing *frzCD-gfp* from a plasmid and under the control of  
17 an IPTG inducible promoter. Under these conditions, FrzCD also co-localized with the  
18 nucleoid and this co-localization was particularly evident in elongated undivided cells  
19 containing multiple segregated nucleoids (Figure 2A-D).

20 These observations suggest that FrzCD can associate with the chromosomes of different  
21 bacterial species, either directly or by the aid of a docking factor common to *M. xanthus* and  
22 *E. coli*.

23

24 **FrzCD directly binds to the DNA**

1 The possibility that FrzCD interacted with the nucleoid was puzzling especially considering  
2 that the direct binding between a chemoreceptor and the DNA has not been reported prior to  
3 this study. To explore this possibility, we generated a 6His-tagged FrzCD version, purified it  
4 from *E. coli* and tested its ability to form complexes with DNA. FrzCD binds directly to DNA  
5 because its presence altered DNA mobility on agarose gels (Figure 3A). Binding did not  
6 require extended DNA fragments because it was also observed with oligomers of DNA as  
7 small as 69 bp (Figure 3-figure supplement 1). Moreover, FrzCD DNA-binding did not seem  
8 to depend on the DNA sequence nor on its GC content (Figure 3-figure supplement 1) as  
9 anticipated by the *in vivo* results showing that FrzCD is distributed all over the nucleoid in the  
10 absence of FrzE (Figure 1A and B).

11 The shift pattern depended on the FrzCD concentration (Figure 3A). More specifically, the  
12 shift of DNA fragments gradually increased as the FrzCD concentration was increased  
13 (Figure 3A and Figure 3-figure supplement 1). Such migration profiles have been previously  
14 described for proteins that can nucleate on DNA molecules in a non-specific manner, i.e.  
15 some Type Ib ParA-like proteins (Hester and Lutkenhaus, 2007; Castaing *et al.*, 2008).  
16 However, to exclude that such profiles were due to the formation of FrzCD unfolded  
17 aggregates, we checked the oligomerization state of our purified 6His-FrzCD. As expected for  
18 an MCP, FrzCD forms a homogenous dimer in solution, corresponding to a molecular weight  
19 of  $\sim 90$  kDa (Figure 3-figure supplement 1). Last, 6His-FrzCD activated the  
20 autophosphorylation of the FrzE kinase *in vitro*, proving that it is functional (Figure 3-figure  
21 supplement 1).

22  
23 While FrzCD does not appear to bind specific DNA motifs *in vitro*, it could bind to specific  
24 sites *in vivo* (perhaps with the help of additional factors), explaining the formation of clusters.  
25 To test this possibility, we performed chromatin-immunoprecipitation (ChIP) experiments



1 using the *frzCD-gfp* strain and polyclonal GFP antibodies. As expected, FrzCD-GFP but not a  
2 FrzCD variant that cannot bind DNA (see below) was able to co-immunoprecipitate  
3 significant amounts of DNA. Deep-sequence (ChIP-Seq) (Fioravanti *et al.*, 2013) of the  
4 immunoprecipitated DNA revealed no enrichment in the pool of DNA fragments obtained  
5 with the ChIP meaning that FrzCD-GFP can bind any DNA sequence from the *M. xanthus*  
6 genome (Figure 3-figure supplement 2; the ChipSeq results have also been deposited on GEO  
7 (<https://www.ncbi.nlm.nih.gov/geo/>) and an accession number is being created). As a positive  
8 control we used a *parB-yfp* strain (Harms *et al.*, 2013). In this case, as expected, the nucleoid  
9 region corresponding to positions 9,109 to 9,110 Kb and containing *parS* (Harms *et al.*, 2013)  
10 was highly represented in the DNA pool obtained with ParB-YFP (Figure 3-figure  
11 supplement 2). We conclude that FrzCD binds DNA in a non sequence-specific manner to  
12 recruit FrzE and thus form clusters containing Frz signaling complexes.

13

#### 14 **The FrzCD N-terminal region is required for the FrzCD DNA binding**

15 Beside a very conserved C-terminal methylation domain, FrzCD contains a unique 137  
16 residue N-terminal region (Figure 3B). We then asked whether this region corresponded to the  
17 FrzCD nucleoid-binding domain and tested its ability to form complexes with the DNA in our  
18 gel shift assays. Indeed, the FrzCD N-terminal domain (FrzCD<sup>Δ131-417</sup>) also provoked a  
19 mobility shift of DNA fragments of different length, albeit at a lower efficiency (compare  
20 Figure 3A and C). On the other hand, the FrzCD C-terminal methyl-accepting domain alone  
21 (FrzCD<sup>Δ1-130</sup>) did not associate with any DNA fragment (Figure 3D) showing that the  
22 methylation domain does not bind DNA.

23 To confirm a direct interaction between FrzCD and DNA and also better compare the DNA-  
24 binding properties of FrzCD and FrzCD<sup>Δ131-417</sup>, we performed DNA-protein interaction  
25 experiments using Bio-Layer Interferometry (BLI), a technique previously used to study

1 protein-protein interactions (Arlet *et al.*, 2014). FrzCD and DNA interaction was also detected  
2 in this assay (Figure 3E). Consistent with the gel-shift experiments, binding appeared  
3 complex and could not be fitted to a 1:1 interaction model, precluding precise determination  
4 of a  $K_D$ . Nevertheless, when we compared the DNA binding curves of FrzCD $\Delta^{131-417}$  and  
5 FrzCD, the results confirmed that FrzCD $\Delta^{131-417}$  binds the DNA at a lower efficiency than  
6 FrzCD (showing slower association and faster dissociation, Figure 3E).

7 By further analyzing the FrzCD N-terminal domain, we realized that it contains a positively  
8 charged peptide of approximately 30 amino acids followed by a more negative region  
9 predicted to contain alpha helices (Figure 3B and F, Figure 3-figure supplement 3). By  
10 searching for homologs in the UniProtKB/SwissProt Data Base, we found that such FrzCD N-  
11 terminal basic peptide was similar to the basic tail present at the N terminus of eukaryotic  
12 histones (Figure 3-figure supplement 3) whose deletion has been shown to substantially affect  
13 histone-DNA interactions and decrease nucleosome stability (Parra *et al.*, 2006; Iwasaki *et al.*,  
14 2013). To test whether this sequence had a histone-tail-like function in the binding of FrzCD  
15 to DNA *in vitro*, we generated a 6His-tagged FrzCD version only lacking the basic amino  
16 acid sequence from residue 7 to 27 (FrzCD $\Delta^{7-27}$ ), purified it from *E. coli* and tested its ability  
17 to form complexes with the DNA in our gel shift assays. Remarkably, FrzCD $\Delta^{7-27}$  did not shift  
18 the migration of DNA fragments on agarose gels, similarly to FrzCD $\Delta^{1-130}$  missing the entire  
19 N-terminal domain (Figure 3D and 3G). In the BLI assay, binding of FrzCD $\Delta^{7-27}$  to DNA was  
20 still detectable, however it was severely impaired (Figure 3E). This result suggests that the  
21 positively charged motif is required for efficient DNA binding but it may not be the sole  
22 determinant.

23 The different DNA binding efficiencies of the four FrzCD, FrzCD $\Delta^{1-130}$ , FrzCD $\Delta^{131-417}$  and  
24 FrzCD $\Delta^{7-27}$  alleles were not due to altered protein stability and folding because all

1 recombinant proteins, except as expected FrzCD $\Delta^{131-417}$  (the signaling domain) were able to  
2 activate the autophosphorylation of the FrzE kinase *in vitro* (Figure 3-figure supplement 1).

3

#### 4 **The binding of FrzCD to the nucleoid is required for FrzCD cluster formation *in vivo***

5 To check whether the absence of the N terminus or the basic tail also affected the binding of  
6 FrzCD to DNA *in vivo*, we used *M. xanthus* strains expressing *frzCD* $\Delta^{6-130}$ -*gfp* or *frzCD* $\Delta^{7-27}$ -  
7 *gfp* at the *frzCD* locus (Mauriello *et al.*, 2009 and this study). The FrzCD $\Delta^{6-130}$ -GFP and  
8 FrzCD $\Delta^{7-27}$ -GFP fluorescence appeared mostly diffused, also occupying the polar regions  
9 (Figure 1A-D). The two protein fusions could only rarely form short-lived clusters that  
10 localized anywhere in the cells (not only at the central region). In all cases, the aberrant  
11 localization patterns were not due to protein stability (Figure 1-figure supplement 3). In  
12 addition, when FrzCD $\Delta^{6-130}$ -GFP and FrzCD $\Delta^{7-27}$ -GFP were produced in *E. coli* they also lost  
13 their co-localization with the nucleoid. However, instead of looking dispersed in the  
14 cytoplasm as in *M. xanthus*, FrzCD $\Delta^{6-130}$ -GFP and FrzCD $\Delta^{7-27}$ -GFP were confined at one cell  
15 pole in *E. coli*. It is likely that FrzCD $\Delta^{6-130}$ -GFP and FrzCD $\Delta^{7-27}$ -GFP formed aggregates  
16 targeted to the poles due to the absence of the nucleoid anchor (Figure 2).

17

#### 18 **FrzCD cluster dynamics are confined to small nucleoid areas**

19 To understand how FrzCD clusters are formed along the nucleoid, we analyzed the cluster  
20 dynamics at high temporal resolution. Contrarily to previous assumptions based on lower  
21 resolution analysis (Mauriello, Astling, *et al.*, 2009), this analysis showed that FrzCD clusters  
22 are quite fixed and only featured by Brownian-like motions in highly constrained areas of the  
23 nucleoid (Figure 4A-C). This mobility decreased with the increase of cluster intensity,  
24 suggesting that clusters containing more molecules might be more tightly anchored to the  
25 chromosome and, hence, more fixed (Figure 4D). To test whether the signaling state of

1 FrzCD also affects the cluster mobility, we tested whether clusters were also constrained in  
2 strains carrying point mutations either generating FrzCD loss of function or, oppositely,  
3 FrzCD gain of function (Astling *et al.*, 2006; Mauriello, Astling, *et al.*, 2009; Guzzo *et al.*,  
4 2015). There were no notable differences between the tested conditions, suggesting that  
5 signaling does not affect the nucleoid dynamics of Frz signaling complexes along the  
6 nucleoid (Figure 4E).

7

### 8 **The nucleoid-dependent assembly could promote cooperative interactions between** 9 **FrzCD receptors**

10 Consistent with transmembrane chemosensory clusters (Francis *et al.*, 2002; Li *et al.*, 2011;  
11 Li and Hazelbauer, 2011; Piñas *et al.*, 2016), the formation of Frz nucleoid-associated clusters  
12 is not strictly required for signaling. In fact, it has been previously shown that a *frzCD*<sup>Δ6-130</sup>  
13 strain, where FrzCD molecules can no longer bind DNA and are, thus, diffused (Figure 1),  
14 can still produce reversals (Bustamante *et al.*, 2004). This is not surprising because in *E. coli*  
15 chemosensory cluster formation is also not critical for the signal transduction, but it confers  
16 properties such as the amplification of signal, a direct consequence of the cooperative  
17 interactions between clustered chemoreceptors (Sourjik and Berg, 2004; Ames and Parkinson,  
18 2006; Li and Hazelbauer, 2014; Piñas *et al.*, 2016; Frank *et al.*, 2016). Thus, we decided to  
19 check if the formation of Frz clusters also led to cooperativity in the signaling activity of the  
20 Frz chemosensory system. For this, we took advantage of a newly developed microfluidic  
21 single cell assay where the frequency of reversals can be measured as a function of increasing  
22 concentrations of an artificial Frz-signal activator, the isoamyl alcohol (IAA) (Guzzo *et al.*,  
23 2015). Consistent with previous observations (Guzzo *et al.*, 2015), in cells where FrzCD  
24 formed nucleoid bound clusters, IAA induced a dose-dependent response with a sigmoidal  
25 shaped curve that could be fitted by the Hill equation with a coefficient  $n = 3.017 \pm 0.2$  ( $P =$

1 0.0007), which is significantly higher than one and reveals the presence of cooperativity in  
2 the FrzCD activity (Figure 5A). Such response is FrzCD-dependent because a  $\Delta frzCD$  strain  
3 does not reverse at any IAA dose (Figure 5A). In the  $frzCD^{\Delta 6-130}$  mutant, the dose-dependent  
4 response curve to IAA resulted to a Hill coefficient  $n = 1.15 \pm 0.01$  ( $P = 0.008$ ) when it was  
5 fitted by the Hill equation, revealing that cooperation is lost in this mutant. These results  
6 suggest that while the IAA response in the  $frzCD^{\Delta 6-130}$  mutant only depends on the number of  
7 the  $FrzCD^{\Delta 6-130}$  molecules in the cytoplasm, in cells where FrzCD formed nucleoid bound  
8 clusters, such response also depends on the supra-molecular organization of the FrzCD  
9 proteins, presumably because of cooperative protein interactions in the clusters (Lai *et al.*,  
10 2005; Li and Hazelbauer, 2014; Piñas *et al.*, 2016). This signal amplification is advantageous  
11 to *M. xanthus* social behaviors because swarming and predation are defective in the  $frzCD^{\Delta 6-130}$   
12 mutant compared to the wild type (Figure 5B and C).

13

## 1 **DISCUSSION**

2 In this work, we show that analogously to how transmembrane chemoreceptors use the  
3 bacterial inner membrane as a platform to form the well described arrays of trimers of dimers  
4 (Briegel *et al.*, 2012b), the *M. xanthus* Frz system forms signaling clusters on the bacterial  
5 chromosome. Cluster assembly is directed by the chemoreceptor FrzCD, which binds to the  
6 DNA by a N-terminal domain carrying a positively charged tail similar to that found in  
7 eukaryotic histones (Parra *et al.*, 2006; Iwasaki *et al.*, 2013). While the binding of FrzCD to  
8 DNA is essential to target the Frz chemosensory system to the nucleoid, it is not sufficient for  
9 Frz cluster formation, as it requires downstream interactions with the FrzE kinase. Because  
10 FrzCD appears to bind DNA in a non-sequence specific manner, DNA-bound clusters do not  
11 occupy fixed localization sites and move across small areas on the nucleoid surface.  
12 Analogous to trans-membrane proteins diffusing in the bacterial membrane, the FrzCD cluster  
13 dynamic behavior may be affected by the size of the complex (and thus the number of  
14 interactions with DNA), explaining why bright clusters show Brownian-like motions that only  
15 explore constrained nucleoid areas.

16 Several lines of evidence suggest that the Frz cluster formation on the nucleoid occurs in a  
17 stochastic manner similarly to the assembly of the *E. coli* Che lattices in the membrane. First,  
18 the initial binding of FrzCD to DNA might take place anywhere on the nucleoid as such  
19 binding is not DNA-sequence specific. Once recruited to the nucleoid, small FrzCD foci  
20 diffuse, non-directionally, across confined small areas until they might nucleate large fixed  
21 clusters by attracting more FrzCD molecules. “Newborn” FrzCD foci might also, at one point,  
22 be incorporated by existing neighboring clusters. Thus, the areas explored by FrzCD clusters  
23 might represent the minimal critical distance from other clusters at which foci can exist. The  
24 existence of such minimal critical distance is supported by the fact that the number of Frz  
25 clusters increases linearly with the nucleoid size (Figure 1-figure supplement 4), suggesting

1 that more clusters can form when more surface becomes available. Thus, like for  
2 transmembrane chemoreceptors, FrzCD molecules might either nucleate new dynamic foci if  
3 they are far enough from existing clusters, or encounter and join neighboring clusters.  
4 Transmembrane chemoreceptors are arrayed in a monolayer tightly associated with the inner  
5 membrane (Briegel *et al.*, 2009). However, in the absence of a scaffold *Vibrio sp.* and *R.*  
6 *sphaeroides* cytoplasmic chemosensory arrays, are instead organized in two sandwiched  
7 arrays (Briegel *et al.*, 2014; Briegel *et al.*, 2015; Briegel *et al.*, 2016). Our data suggest that  
8 the *M. xanthus* chromosome functions as a platform to form signaling clusters, much like the  
9 inner membrane supports transmembrane chemosensory complexes. In the future, it will be  
10 interesting to test if the Frz proteins, indeed, form single layered arrays at the surface of the  
11 chromosome by Cryo-EM tomography.  
12 But, what is the outcome of this nucleoid driven cluster assembly? FrzCD cluster formation  
13 has been previously been associated to regulation of the cell reversal frequency in response to  
14 cell-cell contact. In fact, FrzCD clusters align in adjacent *M. xanthus* cells, a behavior that  
15 also seemed to induce cell reversals (Mauriello, Astling, *et al.*, 2009). The authors' argument  
16 in favor of a retro-regulated FrzCD cluster rearrangement in response to cell contact was that  
17 adjacent cells of a *frzE* strain, which also seemed to form FrzCD-GFP clusters even if more  
18 diffused, did not produce cluster alignment. In light of our new results, what seemed to be  
19 more diffused FrzCD clusters in the *frzE* strain, are, in fact, FrzCD molecules dispersed on  
20 the nucleoid. Moreover, we now show that the Frz cluster organization is independent on the  
21 Frz signaling activity. Thus, the observed FrzCD cluster alignment might be more likely  
22 determined by similar dynamic rearrangements of the nucleoid of adjacent cells rather than by  
23 an active regulated mechanism.  
24 Therefore, a simpler outcome of the nucleoid-driven Frz cluster assembly could be to confer  
25 to a cytoplasmic receptor the universal properties of transmembrane receptors but here, in

1 response to intracellular signals. One of these properties is the signal amplification, which, in  
2 enteric bacteria, strictly requires the MCP clustering to the membrane. Remarkably, this work  
3 as well as previous studies shows that wild type *M. xanthus* cells respond to increasing  
4 concentrations of the Frz activator IAA with a dose-dependent response curve typical of a  
5 cooperative response that strongly suggests the presence of signal amplification. Analogously  
6 to enteric bacteria, signal amplification must be due to the supra-molecular organization of  
7 FrzCD receptors on the nucleoid, because such property is lost in FrzCD<sup>Δ6-130</sup> lacking the  
8 nucleoid binding domain. In cells of this strain, the reversal frequencies increase linearly with  
9 the IAA doses, suggesting that, in this case, signaling is only function of the number of  
10 activated receptor-signaling complexes dispersed in the cytoplasm.

11 Why does FrzCD need to form many and not just one single cluster? One possibility could be  
12 to prevent the diffusion of CheY-P to be a limiting factor in the control of the polar and lateral  
13 motility motors due to the length of *M. xanthus* cells (5-10 μm in average). However, a more  
14 attractive explanation could be that the nucleoid-dependent formation of multiple distributed  
15 clusters represents a simple mechanism to segregate clusters during cell division without the  
16 need for a faithful partitioning system (Figure 1-figure supplement 5). Such partitioning  
17 system would be, in fact, likely required in the presence of a single cluster like in *R.*  
18 *sphaeroides* where PpfA ensures the faithful segregation of Tlp clusters (Thompson *et al.*,  
19 2006; Ringgaard *et al.*, 2011).

20

21 Finally, the analysis of the FrzCD sequences from some related species of δ-proteobacteria  
22 shows that while the FrzCD C-terminal region is very conserved, its N-terminus largely  
23 varies. Nevertheless, the FrzCD N-terminus always shows a positively charged sequence  
24 (Figure 3-figure supplement 4) suggesting that the non sequence-specific recruitment of Frz



1 proteins to the nucleoid essentially requires the presence of a positively charged protein  
2 domain rather than a specific amino acid sequence.  
3 This type of cellular organization may be common to other bacterial macromolecular  
4 complexes to provide important regulatory functions. In this sense, the Frz example provides  
5 new perspectives to the role of the bacterial nucleoid as a scaffold for the spatial control of  
6 cellular functions.  
7

## 1 MATERIALS AND METHODS

### 2 Bacterial strains, plasmids and growth

3 Strains and plasmids are listed in Table S1 and S2. *M. xanthus* strains were grown at 32°C in  
4 CYE rich media as previously described. *Pcuo::parB-ΔparB* cells were grown at 32°C in  
5 CTT supplied with 300 μM CuSO<sub>4</sub>.

6 Plasmids were introduced into *M. xanthus* cells by electroporation. Deletions and GFP fusions  
7 were inserted in frame to avoid polar effects on the downstream gene expression. These  
8 strains were obtained by homologous recombination based on a previously reported method  
9 using the pBJ113 or pBJ114 vectors (Bustamante *et al.*, 2004; Moine *et al.*, 2014). To  
10 generate strains expressing GFP or mCherry fusion proteins, we constructed DNA cassettes  
11 including the last approximately 800 bp of each gene, with the exception of the stop codon;  
12 the gene encoding the *egfp* or *mcherry* genes from pEGFP-N1 (Invitrogen) or pEM147  
13 (Mauriello, Nan, *et al.*, 2009) excluding the start codon and including the stop codon; the  
14 intergenic region between the gene of interest and its immediately downstream gene, if any;  
15 the first 800 bp of the downstream gene.

16 To construct the *parB* conditional mutant, we transferred the previously described *parB*  
17 conditional depletion (Harms *et al.*, 2013) in our wild type strain, DZ2 (Harms *et al.*, 2013;  
18 Iniesta, 2014).

19 To construct strains carrying a FrzS-YFP fusion, we used the pEFrzSY plasmid (Guzzo *et al.*,  
20 2015)

21 *Escherichia coli* cells were grown under standard laboratory conditions in Luria-Bertani broth  
22 supplemented with antibiotics if necessary.

23 For swarming assays, cells (5 μl) at a concentration of 5×10<sup>9</sup> cfu ml<sup>-1</sup> were spotted on CYE  
24 agar plates and incubated at 32°C and photographed after respectively 48h with an Olympus  
25 SZ61 binocular stereoscope. For predation assays, *E. coli* (3μl at a concentration of 5×10<sup>9</sup> cfu

1 ml<sup>-1</sup>) and *M. xanthus* cells (3µl at a concentration of 5×10<sup>9</sup> cfu ml<sup>-1</sup>) were spotted at 0.7 mm  
2 distance from each other on CF agar plates, incubated at 32°C and photographed after 72 h.

3

#### 4 **Protein purification**

5 BL21(DE3) [F<sup>-</sup> ompT hsdSB(rB<sup>-</sup> mB<sup>-</sup>) gal dcm (DE3)] cells were grown in Luria-Bertani  
6 broth supplemented 100 µg/ml ampicillin to mid-exponential phase at 37°C. For the  
7 experiments shown on Figure 3 and phosphorylation assays on Figure 3-figure supplement 1,  
8 overexpression was induced by adding 0,1 mM IPTG for cells containing plasmid pEM414 or  
9 0,5mM for pEM415 and pEM433. Cells were then grown at 16°C over night. Cells were  
10 washed and resuspended in lysis buffer (50 mM TrisHCl, pH 8; 300 mM NaCl; 100 µg/ml  
11 PMSF; 30 U/mL Benzonase) and lysed at the French press. The cell lysates were centrifuged  
12 at 4°C for 30 min at 13000× rpm. Soluble tagged His<sub>6</sub>-proteins were purified on 1ml  
13 HisTrap<sup>TM</sup>FF columns (GE Healthcare) and desalted with PD-10 columns (GE Healthcare).  
14 Ultimately, purified proteins were eluted in 50 mM TrisHCl, pH 8 and 300 mM NaCl.

15 For the experiments shown on Figure 3-figure supplement 1A-E, the C-terminal-tagged  
16 FrzCD-(His)<sub>6</sub> was expressed in *E. coli* BL21-AI (Invitrogen) cells. The cells were grown in  
17 Luria-Bertani broth containing 100 µg/ml ampicillin at 37°C till OD<sub>600</sub> of 0.8 – 1.0, and  
18 incubated at 30°C for 5 hours post induction. The harvested cells were resuspended in Buffer  
19 A (50 mM Tris, 200 mM NaCl, pH 8.0) containing 10 % glycerol and lysed by sonication  
20 (Sonics VibraCell, 5 minutes, 60% amplitude, 1” ON, 3” OFF cycle). The cell lysate was  
21 spun at 39, 191 g for an hour and the supernatant loaded to a 5-ml HisTrap<sup>TM</sup> FF (GE  
22 Healthcare) equilibrated with Buffer A. Following wash and elution with increasing  
23 concentrations (5%, 10%, 20%, 50% and 100%) of Buffer B (50 mM Tris, 200 mM NaCl,  
24 500 mM imidazole, pH 8.0), pure fractions containing FrzCD-H<sub>6</sub> were pooled and dialysed  
25 into buffer containing 50 mM Tris, 25 mM NaCl, 1 mM EDTA, pH 8.0 to enable further

1 purification through ion exchange chromatography using a MonoQ-PE (GE Healthcare)  
2 column. The fractions containing the protein were pooled and concentrated using centricons.  
3 The protein was finally in buffer containing 50 mM NaCl, 1 mM EDTA and 50 mM Tris pH  
4 8.0 either through dialysis or by buffer exchange during the concentration step. The  
5 concentrated protein was flash frozen and stored in small aliquots in -80°C till further use.

6

### 7 **Electrophoretic mobility shift assays (EMSA)**

8 EMSAs on Figure 3 were carried out by incubating different concentrations of purified  
9 proteins with 10 nM PCR-amplification products of different sizes (Table S4), in buffer (10  
10 mM of TrisHCl at pH 8; 60 mM of NaCl; 10% glycerol). Reactions were incubated for 40  
11 min at 4°C before being loaded on 1% agarose gels. Gel migration was performed in 1X TBE  
12 at 4°C for 55 min. Gels were, then, stained with ethidium bromide and revealed at the UV  
13 light.

14 EMSAs for shorter oligos (Figure 3-figure supplement 1 and Table S4) were carried out  
15 in buffer containing 50 mM Tris, 50 mM NaCl, 1 mM dithiothreitol and 10 % glycerol, pH  
16 7.4. All the oligonucleotide fragments were PCR-amplification products, except the 69 bp  
17 DNA that was generated by annealing the custom-synthesized oligonucleotides (Sigma)  
18 corresponding to the 5' to 3' sequence and its complementary strand (Table S4). The samples  
19 were incubated at 25°C for 20 min and loaded onto the appropriate % of agarose gel (1% for  
20 1.3 kbp, and electrophoresed for 60 – 90 minutes in 1x TAE (40 mM Tris-Acetate and 1 mM  
21 EDTA).

22

23 **Oligomerization study using Size Exclusion Chromatography coupled with Multi-Angle**  
24 **light Scattering (SEC-MALS)**

1 The expected elongated structure of an MCP precludes estimation of the oligomeric status by  
2 size exclusion chromatography alone, and hence we carried out SEC coupled with multi-angle  
3 light scattering to estimate the molecular mass in solution. The mass was determined using a  
4 Wyatt Dawn Heleos II equipped with light scattering detectors at 18 angles and an Optilab  
5 TrEX differential refractive index detector. Protein sample (100  $\mu$ l of 2 mg/ml solution or 45  
6  $\mu$ M) was injected into the size exclusion column (BioRad EnRich650) equilibrated with the  
7 buffer 50 mM Tris, 50 mM NaCl, pH 8.0, and the run carried out at a flow rate of 0.4 ml/min.  
8 The observed molecular masses at various points along the peak in the elution curve were  
9 calculated using the protein concentration estimated from the differential refractive index  
10 (dRI), and measured scattered intensities. The Debye model in the ASTRA software provided  
11 with the equipment was used for fitting the data.

12

### 13 **Biolayer interferometry**

14 Protein-DNA interaction experiments were conducted at 25°C with the BLItz instrument from  
15 ForteBio (Menlo Park, CA, USA). The BLI consists in a real time optical biosensing  
16 technique exploits the interference pattern of white light reflected from two surfaces to  
17 measure biomolecular interactions (Concepcion *et al.*, 2009). Purified 6His-FrzCD, 6His-  
18 FrzCD $\Delta^{131-417}$ , 6His-FrzCD $\Delta^{6-130}$  and 6His-FrzCD $\Delta^{7-27}$  protein ligands were immobilized onto  
19 two different Ni-NTA biosensors (ForteBio) in duplicate at 1 $\mu$ M concentrations. A PCR  
20 amplified DNA fragment (474bp) with primers AGACCCCGCACCCACGGAG and  
21 TCACGCGGGCTCCGGCTC (Eurogentec) was used as the analyte throughout the study at  
22 the 38nM. The assay was conducted in PBS pH 7.5, 0.001% tween-20. The binding reactions  
23 were performed with an initial baseline during 30 seconds, an association step at 120 seconds  
24 and a dissociation step of 120 seconds with lateral shaking at 2200rpm. A double reference

1 subtraction (sensor reference and 6His-FrzCD<sup>Δ1-130</sup>) was applied to account for non-specific  
2 binding, background, and signal drift to minimize sensor variability.

3

#### 4 **Chromatin Immunoprecipitation-deep sequencing (ChIp-seq)**

5 ChIp-seq was performed as previously described (Fioravanti *et al.*, 2013). In particular, mid-  
6 log phase cells (80 ml, OD<sub>600</sub> of 0.6) were cross-linked in 10 mM sodium phosphate (pH 7.6)  
7 and 1% formaldehyde at room temperature for 10 min and on ice for 30 min thereafter,  
8 washed thrice in phosphate buffered saline (PBS) and lysed with lysozyme 2.2 mg ml<sup>-1</sup> in  
9 TES (Tris-HCl 10 mM pH 7.5, EDTA 1 mM, NaCl 100 mM). Lysates (Final volume 1ml)  
10 were sonicated (Branson Digital Sonicator 450, Branson Sonic Power. Co.,  
11 [www.bransonic.com/](http://www.bransonic.com/)) on ice using 10 bursts of 30 sec (50% duty) at 30% amplitude to shear  
12 DNA fragments to an average length of 0.3–0.5 kbp and cleared by centrifugation at 14,000  
13 rpm for 2 min at 4°C. Lysates were normalized by protein content by measuring the  
14 absorbance at 280 nm; ca. 7.5 mg of protein was diluted in 1 mL of ChIP buffer (0.01% SDS,  
15 1.1% Triton X-100, 1.2 mM EDTA, 16.7 mM Tris-HCl [pH 8.1], 167 mM NaCl plus protease  
16 inhibitors (Euromedex, <https://www.euromedex.com/>) and pre-cleared with 80 μL of protein-  
17 A agarose (Sigma-Aldrich, [www.sigmaaldrich.com](http://www.sigmaaldrich.com)) and 100 μg BSA. Polyclonal GFP  
18 antibodies were added to the remains of the supernatant (1:1,000 dilution), incubated  
19 overnight at 4°C with 80 μL of protein-A agarose beads pre-saturated with BSA, washed once  
20 with low salt buffer (0.1% SDS, 1% Triton X-100, 2 mM EDTA, 20 mM Tris-HCl (pH 8.1),  
21 150 mM NaCl), high salt buffer (0.1% SDS, 1% Triton X-100, 2 mM EDTA, 20 mM Tris-  
22 HCl (pH 8.1), 500 mM NaCl) and LiCl buffer (0.25 M LiCl, 1% NP-40, 1% sodium  
23 deoxycholate, 1 mM EDTA, 10 mM Tris-HCl (pH 8.1) and twice with TE buffer (10 mM  
24 Tris-HCl (pH 8.1) and 1 mM EDTA). The protein-DNA complexes were eluted in 500 μL  
25 freshly prepared elution buffer (1% SDS, 0.1 M NaHCO<sub>3</sub>), supplemented with NaCl to a final

1 concentration of 300 mM and incubated overnight at 65°C to reverse the crosslinks. The  
2 samples were treated with 2 µg of Proteinase K for 2 h at 45°C in 40 mM EDTA and 40 mM  
3 Tris-HCl (pH 6.5). DNA was extracted using QIAGEN minelute kit and resuspended in 30 µl  
4 of Elution Buffer. ChIP DNA sequencing was performed using Illumina MiSeq and analyzed  
5 using Galaxy Web Portal ([usegalaxy.org/](http://usegalaxy.org/)). Reads were analyzed by MatLab.

6

### 7 **Protein sequence analyses**

8 In order to search for homologs of the FrzCD N-terminal domain, the first 130 aminoacids of  
9 the FrzCD sequence were BLAST into the UniProtKB/SwissProt Data Base  
10 (<http://blast.ncbi.nlm.nih.gov>). Predictions of secondary structures and protein sequence  
11 alignments were obtained with Jpred (Cole *et al.*, 2008) and Clustal Omega (Sievers and  
12 Higgins, 2002), respectively. To analyze the FrzCD N-terminal region protein charge,  
13 “Sliding window” analyses were performed with Microsoft Excel.

14

### 15 ***In vitro* autophosphorylation assay**

16 *In vitro* phosphorylation assays were performed with *E. coli* purified recombinant proteins. 4  
17 µg of FrzE<sup>kinase</sup> were incubated with 1µg of FrzA and increasing concentrations (3µg) of  
18 different FrzCD proteins (entire FrzCD, FrzCD<sup>c</sup>, FrzCDA6-130, FrzCDA7-27 or FrzCDA131-  
19 417) in 25 µl of buffer P (50 mM Tris-HCl, pH 7.5; 1 mM DTT; 5 mM MgCl<sub>2</sub>; 50mM KCl; 5  
20 mM EDTA; 50µM ATP, 10% glycerol) supplemented with 200 µCi ml<sup>-1</sup> (65 nM) of [ $\gamma$ -  
21 33P]ATP (PerkinElmer, 3000 Ci mmol<sup>-1</sup>) for 10 minutes at room temperature in order to  
22 obtain the optimal FrzE<sup>kinase</sup> autophosphorylation activity. Each reaction mixture was stopped  
23 by addition of 5 × Laemmli and quickly loaded onto SDS-PAGE gel. After electrophoresis,  
24 proteins were revealed using Coomassie Brilliant Blue before gel drying. Radioactive proteins  
25 were visualized by autoradiography using direct exposure to film (Carestream).

1

## 2 **Fluorescence microscopy and image analysis**

3 For fluorescence microscopy analyses, 5  $\mu\text{l}$  of cells from  $4 \times 10^8$  cfu  $\text{ml}^{-1}$  vegetative CYE  
4 cultures were spotted on a thin fresh TPM agar pad at the top a slide (Mignot *et al.*, 2005). A  
5 cover slip was added immediately on the top of the pad, and the obtained slide was analyzed  
6 by microscopy using a Nikon Eclipse TE2000 E PFS inverted epifluorescence microscope  
7 (100 x oil objective NA 1.3 Phase Contrast) (Ducret *et al.*, 2009).

8 To study the colocalization with the DNA, the TPM agar pads were supplied with  $1\mu\text{g/ml}$   
9 DAPI stain and 1 mM IPTG. Prior to imaging, *E. coli* cells were grown in 1 mM IPTG for  
10 one hour then spotted on agar pads containing or not  $10\mu\text{g/ml}$  cephalixin and incubated for 1  
11 hour. Cell fluorescence profiles were obtained with the “plot profile” function of FIJI  
12 (Schindelin *et al.*, 2012). FrzCD clusters numbers and distances, nucleoid areas and cell areas  
13 were automatically determined and verified manually with the “MicrobeJ” Fiji/ImageJ plugin  
14 created by A. Ducret, Brun Lab (<http://www.indiana.edu/~microbej/index.html>). All data  
15 plots and statistical tests were obtained with the R software (<https://www.r-project.org/>).

16 To study the dynamic of FrzCD-GFP clusters we automatically tracked clusters (imaged  
17 every second) by MicrobeJ and recorded parameters such as the mean square displacement  
18 (MSD), the confinement radius and the fluorescence intensity along the time.

19 For manual image analysis we chose a sample size that allowed an error on the mean (sem)  
20 lower than 10%. For results generated by automated analyses, we analyzed all the available  
21 samples. We chose all cells where clusters and nucleoids were tractable by our image analysis  
22 tools (Fiji and MicrobeJ). For the cluster dynamic determinations we analyzed all clusters that  
23 were tractable for at least 5 consecutive frames.

24

## 25 **Reversal frequencies**



1 These assays were performed as previously described (Guzzo *et al.*, 2015) by using  
2 homemade PDMS glass microfluidic chambers (Ducret *et al.*, 2013) treated with 0.015%  
3 carboxymethylcellulose after extensive washing of the glass slide with water. For each  
4 experiment, 1mL of a CYE grown culture of OD = 0.5 was injected directly into the chamber  
5 and the cells were allowed to settle for 5 min. Motility was assayed after the chamber was  
6 washed with TPM 1mM CaCl buffer. For IAA injections, IAA solutions made in TPM 1mM  
7 CaCl buffer at appropriate concentrations were injected directly into the channels and motility  
8 was assayed directly under the microscope. Time-lapse movies of strains carrying a FrzS-YFP  
9 fusion were shot for 20 minutes with frames captured every 15 seconds.

10 To discriminate bona fide reversal events from stick-slip motions (Guzzo *et al.*, 2015), the  
11 fluorescence intensity of FrzS-YFP was measured at cell poles over time. In fact, this protein  
12 has been shown to switch from the leading cell pole to the lagging pole when *M. xanthus* cells  
13 reverse their movement direction (Mignot *et al.*, 2005). For each cell that was tracked, the  
14 fluorescence intensity and reversal profiles were correlated to distinguish bona fide reversals  
15 from stick-slip events. About one hundred cells for the wild type and *frzCD*<sup>Δ1-130</sup> strains and  
16 fifty for the *ΔfrzCD* strain were analyzed (refer to Supplementary Table 3 for the exact  
17 number of cells analyzed for each strain and IAA dose). The number of reversals was plotted  
18 against time. The best fits for the reversal frequencies values at the different IAA doses were  
19 obtained with the following Hill equation:

$$\frac{N_{rev}}{\Delta T} = \frac{[IAA]^n}{K_d + [IAA]^n} B + A$$

20 where the  $N_{rev}/\Delta T$  is the number of reversal events per hour;  $K_d$  is the apparent affinity  
21 constant;  $[IAA]$  is the IAA dose;  $B$  is the plateau;  $A$  is the basal reversal frequency and  $n$  is the  
22 Hill coefficient describing cooperativity. Reversal frequency values for each IAA dose and  
23 each strain are the results of two independent biological triplicates.

1 We chose a sample size that allowed an error on the mean (sem) lower than 10%. We used all  
2 cells that moved, remained isolated for at least 20 consecutive frames and where FrzS-YFP  
3 foci were detectable by FIJI.

4

## 1 **Acknowledgments**

2 We would like to thank Dr. Romain Mercier and Dr. Thierry Doan for their critical reading of  
3 the manuscript and discussions; Dr. Mireille Ansaldi for her advise on the EMSA assays;  
4 Hanna Bismuth for helping with the ChIP experiments; Pravin Dewangan and Dr. Radha  
5 Chauhan for use of the SEC-MALS facility at National Centre for Cell Science, Pune, India.  
6 Research on chemotaxis in our laboratory is funded by the Agence National de la Recherche  
7 Jeune Chercheur-Jeune Chercheuse (ANR-14-CE11-0023-01) to E.M.M and the “Fondation  
8 Amidex” award to EM and TM. YM, PJJ and PG acknowledge fellowships from INSPIRE,  
9 Department of Science and Technology (DST), Govt. of India and the work in the lab at  
10 IISER Pune is supported by Innovative Young Biotechnologist Award (IYBA from  
11 Department of Biotechnology, Govt. of India), Indian National Science Academy (INSA),  
12 and Science and Engineering Research Board (SERB), DST.

13

14

15

## 1 BIBLIOGRAPHY

- 2 Ames, P., and Parkinson, J.S. (2006) Conformational suppression of inter-receptor signaling  
3 defects. *Proc Natl Acad Sci U S A* **103**: 9292–9297.
- 4 Arlet, J.-B., Ribeil, J.-A., Guillem, F., Negre, O., Hazoume, A., Marcion, G., *et al.* (2014)  
5 HSP70 sequestration by free  $\alpha$ -globin promotes ineffective erythropoiesis in  $\beta$ -thalassaemia.  
6 *Nature* **514**: 242–246.
- 7 Astling, D.P., Lee, J.Y., and Zusman, D.R. (2006) Differential effects of chemoreceptor  
8 methylation-domain mutations on swarming and development in the social bacterium  
9 *Myxococcus xanthus*. *Mol Microbiol* **59**: 45–55.
- 10 Berleman, J.E., and Bauer, C.E. (2005) Involvement of a Che-like signal transduction cascade  
11 in regulating cyst cell development in *Rhodospirillum centenum*. *Mol Microbiol* **56**: 1457–  
12 1466.
- 13 Bible, A., Russell, M.H., and Alexandre, G. (2012) The *Azospirillum brasilense* Che1  
14 chemotaxis pathway controls swimming velocity, which affects transient cell-to-cell  
15 clumping. *J Bacteriol* **194**: 3343–3355.
- 16 Blackhart, B.D., and Zusman, D.R. (1985) “Frizzy” genes of *Myxococcus xanthus* are  
17 involved in control of frequency of reversal of gliding motility. *Proc Natl Acad Sci U S A* **82**:  
18 8767–8770.
- 19 Briegel, A., Ladinsky, M.S., Oikonomou, C., Jones, C.W., Harris, M.J., Fowler, D.J., *et al.*  
20 (2014) Structure of bacterial cytoplasmic chemoreceptor arrays and implications for  
21 chemotactic signaling. *eLife* **3**: e02151.
- 22 Briegel, A., Li, X., Bilwes, A.M., Hughes, K.T., Jensen, G.J., and Crane, B.R. (2012a)  
23 Bacterial chemoreceptor arrays are hexagonally packed trimers of receptor dimers networked  
24 by rings of kinase and coupling proteins. *Proc Natl Acad Sci U S A* **109**: 3766–3771.
- 25 Briegel, A., Li, X., Bilwes, A.M., Hughes, K.T., Jensen, G.J., and Crane, B.R. (2012b)  
26 Bacterial chemoreceptor arrays are hexagonally packed trimers of receptor dimers networked  
27 by rings of kinase and coupling proteins. *Proc Natl Acad Sci U S A* **109**: 3766–3771.
- 28 Briegel, A., Ortega, D.R., Huang, A.N., Oikonomou, C.M., Gunsalus, R.P., and Jensen, G.J.  
29 (2015) Structural conservation of chemotaxis machinery across Archaea and Bacteria.  
30 *Environ Microbiol Rep* **7**: 414–419.
- 31 Briegel, A., Ortega, D.R., Mann, P., Kjær, A., Ringgaard, S., and Jensen, G.J. (2016)  
32 Chemotaxis cluster 1 proteins form cytoplasmic arrays in *Vibrio cholerae* and are stabilized  
33 by a double signaling domain receptor DosM. *Proc Natl Acad Sci U S A* **113**: 10412–10417.
- 34 Briegel, A., Ortega, D.R., Tocheva, E.I., Wuichet, K., Li, Z., Chen, S., *et al.* (2009) Universal  
35 architecture of bacterial chemoreceptor arrays. *Proc Natl Acad Sci U S A* **106**: 17181–17186.
- 36 Bustamante, V.H., Martinez-Flores, I., Vlamakis, H.C., and Zusman, D.R. (2004) Analysis of  
37 the Frz signal transduction system of *Myxococcus xanthus* shows the importance of the  
38 conserved C-terminal region of the cytoplasmic chemoreceptor FrzCD in sensing signals. *Mol*  
39 *Microbiol* **53**: 1501–13.
- 40 Castaing, J.-P., Bouet, J.-Y., and Lane, D. (2008) F plasmid partition depends on interaction  
41 of SopA with non-specific DNA. *Mol Microbiol* **70**: 1000–1011.
- 42 Cole, C., Barber, J.D., and Barton, G.J. (2008) The Jpred 3 secondary structure prediction  
43 server. *Nucleic Acids Res* **36**: W197–W201.
- 44 Concepcion, J., Witte, K., Wartchow, C., Choo, S., Yao, D., Persson, H., *et al.* (2009) Label-  
45 free detection of biomolecular interactions using BioLayer interferometry for kinetic  
46 characterization. *Comb Chem High Throughput Screen* **12**: 791–800.
- 47 Ducret, A., Maisonneuve, E., Notareschi, P., Grossi, A., Mignot, T., and Dukan, S. (2009) A  
48 microscope automated fluidic system to study bacterial processes in real time. *PloS One* **4**:  
49 e7282.
- 50 Ducret, A., Théodoly, O., and Mignot, T. (2013) Single cell microfluidic studies of bacterial

- 1 motility. *Methods Mol Biol Clifton NJ* **966**: 97–107.
- 2 Fioravanti, A., Fumeaux, C., Mohapatra, S.S., Bompard, C., Brilli, M., Frandi, A., *et al.*
- 3 (2013) DNA Binding of the Cell Cycle Transcriptional Regulator GcrA Depends on N6-
- 4 Adenosine Methylation in *Caulobacter crescentus* and Other Alphaproteobacteria. *PLoS*
- 5 *Genet* **9**: e1003541.
- 6 Francis, N.R., Levit, M.N., Shaikh, T.R., Melanson, L.A., Stock, J.B., and DeRosier, D.J.
- 7 (2002) Subunit organization in a soluble complex of tar, CheW, and CheA by electron
- 8 microscopy. *J Biol Chem* **277**: 36755–36759.
- 9 Frank, V., Piñas, G.E., Cohen, H., Parkinson, J.S., and Vaknin, A. (2016) Networked
- 10 Chemoreceptors Benefit Bacterial Chemotaxis Performance. *mBio* **7**.
- 11 Guzzo, M., Agrebi, R., Espinosa, L., Baronian, G., Molle, V., Mauriello, E.M.F., *et al.* (2015)
- 12 Evolution and Design Governing Signal Precision and Amplification in a Bacterial
- 13 Chemosensory Pathway. *PLoS Genet* **11**: e1005460.
- 14 Harms, A., Treuner-Lange, A., Schumacher, D., and Sogaard-Andersen, L. (2013) Tracking
- 15 of chromosome and replisome dynamics in *Myxococcus xanthus* reveals a novel chromosome
- 16 arrangement. *PLoS Genet* **9**: e1003802.
- 17 Hester, C.M., and Lutkenhaus, J. (2007) Soj (ParA) DNA binding is mediated by conserved
- 18 arginines and is essential for plasmid segregation. *Proc Natl Acad Sci U S A* **104**: 20326–
- 19 20331.
- 20 Iniesta, A.A. (2014) ParABS system in chromosome partitioning in the bacterium
- 21 *Myxococcus xanthus*. *PLoS One* **9**: e86897.
- 22 Iwasaki, W., Miya, Y., Horikoshi, N., Osakabe, A., Taguchi, H., Tachiwana, H., *et al.* (2013)
- 23 Contribution of histone N-terminal tails to the structure and stability of nucleosomes. *FEBS*
- 24 *Open Bio* **3**: 363–369.
- 25 Kaimer, C., and Zusman, D.R. (2016) Regulation of cell reversal frequency in *Myxococcus*
- 26 *xanthus* requires the balanced activity of CheY-like domains in FrzE and FrzZ. *Mol Microbiol*
- 27 **100**: 379–395.
- 28 Lai, R.-Z., Manson, J.M.B., Bormans, A.F., Draheim, R.R., Nguyen, N.T., and Manson, M.D.
- 29 (2005) Cooperative signaling among bacterial chemoreceptors. *Biochemistry (Mosc)* **44**:
- 30 14298–14307.
- 31 Li, M., and Hazelbauer, G.L. (2011) Core unit of chemotaxis signaling complexes. *Proc Natl*
- 32 *Acad Sci U S A* **108**: 9390–9395.
- 33 Li, M., and Hazelbauer, G.L. (2014) Selective allosteric coupling in core chemotaxis
- 34 signaling complexes. *Proc Natl Acad Sci U S A* **111**: 15940–15945.
- 35 Li, M., Khursigara, C.M., Subramaniam, S., and Hazelbauer, G.L. (2011) Chemotaxis kinase
- 36 CheA is activated by three neighbouring chemoreceptor dimers as effectively as by receptor
- 37 clusters. *Mol Microbiol* **79**: 677–685.
- 38 Liu, J., Hu, B., Morado, D.R., Jani, S., Manson, M.D., and Margolin, W. (2012) Molecular
- 39 architecture of chemoreceptor arrays revealed by cryoelectron tomography of *Escherichia coli*
- 40 minicells. *Proc Natl Acad Sci U S A* **109**: E1481–1488.
- 41 Martin, A.C., Wadhams, G.H., and Armitage, J.P. (2001) The roles of the multiple CheW and
- 42 CheA homologues in chemotaxis and in chemoreceptor localization in *Rhodobacter*
- 43 *sphaeroides*. *Mol Microbiol* **40**: 1261–1272.
- 44 Mauriello, E.M.F., Astling, D.P., Sliusarenko, O., and Zusman, D.R. (2009) Localization of a
- 45 bacterial cytoplasmic receptor is dynamic and changes with cell-cell contacts. *Proc Natl Acad*
- 46 *Sci U S A* **106**: 4852–4857.
- 47 Mauriello, E.M.F., Nan, B., and Zusman, D.R. (2009) AglZ regulates adventurous (A-)
- 48 motility in *Myxococcus xanthus* through its interaction with the cytoplasmic receptor, FrzCD.
- 49 *Mol Microbiol* **72**: 964–977.
- 50 Mignot, T., Merlie, J.P., and Zusman, D.R. (2005) Regulated pole-to-pole oscillations of a

- 1 bacterial gliding motility protein. *Science* **310**: 855–7.
- 2 Moine, A., Agrebi, R., Espinosa, L., Kirby, J.R., Zusman, D.R., Mignot, T., and Mauriello,  
3 E.M.F. (2014) Functional organization of a multimodular bacterial chemosensory apparatus.  
4 *PLoS Genet* **10**: e1004164.
- 5 Parra, M.A., Kerr, D., Fahy, D., Pouchnik, D.J., and Wyrick, J.J. (2006) Deciphering the  
6 Roles of the Histone H2B N-Terminal Domain in Genome-Wide Transcription. *Mol Cell Biol*  
7 **26**: 3842–3852.
- 8 Piñas, G.E., Frank, V., Vaknin, A., and Parkinson, J.S. (2016) The source of high signal  
9 cooperativity in bacterial chemosensory arrays. *Proc Natl Acad Sci U S A* **113**: 3335–3340.
- 10 Ringgaard, S., Schirner, K., Davis, B.M., and Waldor, M.K. (2011) A family of ParA-like  
11 ATPases promotes cell pole maturation by facilitating polar localization of chemotaxis  
12 proteins. *Genes Dev* **25**: 1544–1555.
- 13 Ringgaard, S., Zepeda-Rivera, M., Wu, X., Schirner, K., Davis, B.M., and Waldor, M.K.  
14 (2014) ParP prevents dissociation of CheA from chemotactic signaling arrays and tethers  
15 them to a polar anchor. *Proc Natl Acad Sci U S A* **111**: E255-264.
- 16 Schindelin, J., Arganda-Carreras, I., Frise, E., Kaynig, V., Longair, M., Pietzsch, T., *et al.*  
17 (2012) Fiji: an open-source platform for biological-image analysis. *Nat Methods* **9**: 676–682.
- 18 Sievers, F., and Higgins, D.G. (2002) Clustal Omega. In *Current Protocols in Bioinformatics*.  
19 John Wiley & Sons, Inc.,  
20 <http://onlinelibrary.wiley.com.gate1.inist.fr/doi/10.1002/0471250953.bi0313s48/abstract>.  
21 Accessed August 17, 2015.
- 22 Sourjik, V., and Berg, H.C. (2000) Localization of components of the chemotaxis machinery  
23 of *Escherichia coli* using fluorescent protein fusions. *Mol Microbiol* **37**: 740–751.
- 24 Sourjik, V., and Berg, H.C. (2002) Binding of the *Escherichia coli* response regulator CheY  
25 to its target measured in vivo by fluorescence resonance energy transfer. *Proc Natl Acad Sci*  
26 *U S A* **99**: 12669–12674.
- 27 Sourjik, V., and Berg, H.C. (2004) Functional interactions between receptors in bacterial  
28 chemotaxis. *Nature* **428**: 437–441.
- 29 Strahl, H., Ronneau, S., González, B.S., Klutsch, D., Schaffner-Barbero, C., and Hamoen,  
30 L.W. (2015) Transmembrane protein sorting driven by membrane curvature. *Nat Commun* **6**:  
31 8728.
- 32 Studdert, C.A., and Parkinson, J.S. (2005) Insights into the organization and dynamics of  
33 bacterial chemoreceptor clusters through in vivo crosslinking studies. *Proc Natl Acad Sci U S*  
34 *A* **102**: 15623–15628.
- 35 Thiem, S., and Sourjik, V. (2008) Stochastic assembly of chemoreceptor clusters in  
36 *Escherichia coli*. *Mol Microbiol* **68**: 1228–1236.
- 37 Thompson, S.R., Wadhams, G.H., and Armitage, J.P. (2006) The positioning of cytoplasmic  
38 protein clusters in bacteria. *Proc Natl Acad Sci U S A* **103**: 8209–8214.
- 39 Typas, A., and Sourjik, V. (2015) Bacterial protein networks: properties and functions. *Nat*  
40 *Rev Microbiol* **13**: 559–572.

41

42

1 **Figure legends**

2

3 **Figure 1. FrzCD-GFP colocalizes with the nucleoid in *M. xanthus*.** (A) Micrographs of *M.*  
4 *xanthus* cells carrying a GFP or a mCherry fusion and stained with the DNA DAPI stain. The  
5 genetic backgrounds of the *M. xanthus* strains are indicated on the left. The white arrows  
6 indicate the cells whose fluorescence profiles and correlation coefficients between the DAPI  
7 and GFP localization are shown in (B) and (C), respectively. Cells surrounded by white boxes  
8 are taken from separate original micrographs. Scale bars correspond to 1 $\mu$ m. (B) GFP or  
9 mCherry (green or red) and DAPI fluorescence (blue) profiles with the fluorescence intensity  
10 (arbitrary units) represented on the *y* axis and the cell length positions with -1 and +1  
11 indicating the poles, on the *x* axis. (C) Correlation coefficients between the DAPI and GFP or  
12 mCherry localization.  $R^2$  values > 0,5 indicate significant correlations. (D) Box plots indicate  
13 the medians of the correlation coefficients ( $R^2$ ) from 10 cells (from one biological replicate)  
14 of each of the indicated strains. (E) Micrographs of a *M. xanthus parB* conditional mutant  
15 carrying *frzCD-gfp* or *frzE-mCherry* and DAPI stained. Micrographs were obtained upon 18h  
16 depletion of ParB. The genetic backgrounds of the *M. xanthus* strains are indicated on the left.  
17 Scale bars correspond to 1 $\mu$ m.

18 **Figure 2. FrzCD-GFP colocalizes with the nucleoid in *E. coli*.** (A) Micrographs of *E.coli*  
19 cells carrying a GFP fusion on a plasmid and stained with the DNA DAPI stain. The genetic  
20 fusions are indicated on the left. Cells carrying *frzCD-gfp* were also treated with 10 $\mu$ g/ml  
21 cephalixin to visualize FrzCD-GFP colocalization with the multiple nucleoids of undivided  
22 cells. The white arrows indicate the cells whose fluorescence profiles are shown in (B). Cells  
23 surrounded by white boxes are taken from separate original micrographs. Scale bars  
24 correspond to 1 $\mu$ m. (B) GFP (green) and DAPI fluorescence (blue) profiles with the  
25 fluorescence intensity (arbitrary units) represented on the *y* axis and the cell length positions  
26 with -1 and +1 indicating the poles, on the *x* axis. (C) Correlation coefficients between the

1 DAPI and GFP localization.  $R^2$  values  $> 0,5$  indicate significant correlations. **(D)** Box plots  
2 indicate the medians of the correlation coefficients ( $R^2$ ) from 10 cells (from one biological  
3 replicate) of each of the indicated strains.

4

5 **Figure 3. FrzCD directly interacts with the DNA *in vitro*.** **(A)** Electrophoretic mobility  
6 shift assays (EMSA) on 1% agarose gels stained with ethidium bromide and developed at the  
7 UV light. The indicated concentrations of purified 6His-FrzCD were incubated with a 801 bp  
8 DNA fragment. **(B)** Schematic representation of the FrzCD protein domains. **(C-D)** The  
9 indicated increasing concentrations of 6His-FrzCD $\Delta^{131-417}$  (C) and 6His- FrzCD $\Delta^{1-130}$  (D) were  
10 used in EMSA assays with a 801 bp DNA fragment. **(E)** Average binding curves and  
11 duplicates in degraded colors of each immobilized FrzCD construct 6His- FrzCD, 6His-  
12 FrzCD $\Delta^{131-417}$  or 6His- FrzCD $\Delta^{7-27}$ , with a 474 bp DNA fragment at a concentration of 38nM.  
13 **(F)** “Sliding window” representation indicating the protein charge of the first FrzCD N-  
14 terminal region at the different positions and obtained with 10, 20 and 30 residue windows  
15 (blu, green and red, respectively). **(G)** Increasing concentrations of 6His-FrzCD $\Delta^{7-27}$  were  
16 used in EMSA assays. On the first lane of each gel, 500 ng of the 2-Log DNA ladder (0.1-10  
17 kb, NEB) have been loaded. Data in panel (A, C, D, and G) are representative of three  
18 independent experiments.

19

20 **Figure 4. The organization of FrzCD clusters depends on cluster intensity and mobility.**

21 **(A)** A representative fluorescence 1 second time-lapse (left panel) and the corresponding  
22 kymograph (middle panel) of a *frzCD-gfp* cell (top panel). Big and small arrows indicate large  
23 and small clusters, respectively. The right panel represents the trajectories of each cluster  
24 (same color codes as on the top panel). Scale bars correspond to 1 $\mu$ m. **(B)** Cluster  
25 displacement ( $r$ ) from the mean position at each given time ( $t$ ).  $L$  represents the cell length.



1 The color code corresponding to the logarithm of the ratio  $r/L$  indicates that the amplitude of  
2 the cluster displacement never exceeds 5% of the cell length. **(C)** Box plots indicate the  
3 distribution of the Mean Square Displacements at the different lag times; the mean of each lag  
4 value is indicated by the black dots. **(D)** Box plots indicate a significant decrease of the median  
5 confinement for clusters of low fluorescence intensity compared to high intensity clusters. For  
6 panels B, C and D 1039 clusters from 297 cells (two biological replicates) were analyzed. **(E)**  
7 The box plots and the violin plots show the measured confinements of *frzCD-gfp* strains  
8 blocked in the ON (*frzCD<sub>E168A-G169A</sub>::gfp*) and OFF (*frzCD<sub>E202A-E203A</sub>::gfp*) states. 130 and 150  
9 clusters were analyzed for the ON and OFF states, respectively.

10

11 **Figure 5. Frz cluster formation generates signal sensitivity in turn important for social**

12 **behaviors.** **(A)** The average reversal frequencies, calculated by scoring FrzS-YFP pole-to-  
13 pole oscillations are shown as a function of the IAA concentration for wild type (black),  
14 *frzCD<sup>A6-130</sup>* (red) and  $\Delta$ *frzCD* (grey). Reversal frequencies values of wild type and *frzCD<sup>A6-130</sup>*  
15 can be fitted by the Hill equation with an interval of confidence of 95% (dashed lines). Error  
16 bars represent the standard errors of the means. Reversal frequency values for each IAA dose  
17 and each strain are the results of two independent biological triplicates. About one hundred  
18 cells for the wild type and *frzCD<sup>A6-130</sup>* strains and fifty for the  $\Delta$ *frzCD* strain were analyzed  
19 (refer to Supplementary Table 3 for the exact number of analyzed cells for each strain and  
20 IAA doses used in this experiment). **(B)** Colony expansion of wild type, *frzCD<sup>A6-130</sup>* and  
21  $\Delta$ *frzCD* cells. Error bars represent the standard deviations of the means from three biological  
22 replicates. **(C)** The same strains were analyzed in *E. coli* predation assays.

23

1 **Figure supplements**

2 **Figure 1-figure supplement 1. Representative micrographs of *M. xanthus* cells carrying**  
3 **a GFP or a mCherry fusion and stained with the DNA DAPI stain.** The genetic  
4 backgrounds of the *M. xanthus* strains are indicated on the left. Scale bars correspond to 1µm.

5

6 **Figure 1-figure supplement 2. *frzE*-mCherry cells can swarm and form fruiting bodies**  
7 **like wild type.** Scale bars correspond to 0,5 cm.

8

9 **Figure 1-figure supplement 3. FrzCD and FrzE are stable in different *M. xanthus***  
10 **mutants.** Western blot with anti-FrzCD (A) or anti-FrzE antibodies (B) on the cell extracts of  
11 the indicated *M. xanthus* strains. Scale bars correspond to 1µm. Black lines are used to  
12 indicate that two lanes from the same gel where separated by other lanes there were lanes  
13 between separate lanes from different westerns blots.

14

15 **Figure 1-figure supplement 4. Positive correlation between the number of FrzCD**  
16 **clusters and the nucleoid length (pixels).** Average numbers of clusters with standard  
17 deviations (black dots and bars, respectively) for different nucleoid sizes are shown. Green  
18 dots represent measurements for individual cells. Grey zones represent the variances. 2564  
19 clusters from two biological replicates were analyzed.

20

21 **Figure 1-figure supplement 5. FrzCD segregated in cells with segregated chromosomes.**  
22 (A) 909 cells were ordered according to their cell length (pixels, grey) and for each cells GFP  
23 and DAPI fluorescence are represented as green and blue dots, respectively, at their  
24 corresponding cell position. 0 is the cell center. (B) The three histograms show the average

1 GFP (green) and DAPI (blue) fluorescence density for each cell position for the indicated  
2 cell-size ranges. 0 is the cell center.

3

4 **Figure 3-figure supplement 1. FrzCD binds DNA fragments of different lengths, forms a**  
5 **dimer and promotes FrzE phosphorylation. (A- D)** Electrophoretic mobility shift assay  
6 (EMSA) on agarose gel stained with ethidium bromide and developed at the UV light. DNA  
7 fragments of different lengths and GC contents (Table S4) were incubated with increasing  
8 concentrations of FrzCD-(His<sub>6</sub>) as indicated, including **(A)** 4 nM of Oligo1300 (1% agarose  
9 gel), **(B)** 40 nM of Oligo340-1 (38% GC content; 1.5% agarose gel), **(C)** 40 nM of Oligo340-  
10 2 (61% GC content; 1.5% agarose gel), and **(D)** 300 nM of Oligo70 (2.5% agarose gel). **(E)**  
11 SEC-MALS analysis showing the elution profile (refractive index; black; left y-axis) and the  
12 estimated molar masses (green; right y-axis) of the FrzCD eluted protein. **(F)** SDS page of the  
13 indicated proteins purified from *E. coli* and used for the different experiments shown in  
14 Figure 3. **(G)** Kinetics of the FrzE kinase domain (FrzE<sup>CheA</sup>) auto-phosphorylation were  
15 tested *in vitro* by incubation of FrzE<sup>CheA</sup> in the presence of FrzA, the indicated different form  
16 of FrzCD and ATPγP<sup>33</sup> as a phosphate donor.

17

18 **Figure 3-figure supplement 2. FrzCD-GFP binds the nucleoid in a DNA-sequence**  
19 **independent manner.** A library of DNA fragments was obtained by ChIP experiments on  
20 *frzCD-gfp* and *parB-yfp* strains, using GFP polyclonal antibodies. The figure shows the results  
21 obtained by the deep sequencing of the DNA libraries. Only for *parB-yfp*, we observed an  
22 enrichment corresponding to the nucleoid region containing *parS* (rectangle in the middle  
23 panel and last panel) (Harms *et al.*, 2013) (9,109 to 9,110 Kb). Note that while the number of  
24 reads relative to ParB are represented with a logarithmic scale, for FrzCD we used a regular  
25 scale.

1

2 **Figure 3-figure supplement 3. The FrzCD N-terminal tail has the same properties of that**  
3 **of eukaryotic histones. (A)** Prediction of the FrzCD N-terminal secondary structures. The  
4 nature of each amino acid is also indicated through color codes. **(B)** FrzCD first 50 amino  
5 acid alignment with the N-terminal tail of Histones 2B. The alignment was obtained by  
6 Clustal Omega. Dots indicate similarities and stars identities.

7

8 **Figure 3-figure supplement 4. The FrzCD N-terminus from different species show**  
9 **similar amounts of positively charged amino acids.** The alignment of FrzCD sequences  
10 from the indicated species was obtained by Clustal Omega. Stars indicate identities.

11

12

1 Table S1: Strains used in this study

2

| Strains | Genotyp                                                                  | Deletion       | Source                  |
|---------|--------------------------------------------------------------------------|----------------|-------------------------|
| DZ2     | <i>wt</i>                                                                |                | Zusman et al., 1982     |
| DZ4620  | <i>frzCD-gfp</i>                                                         |                | Mauriello et al., 2009  |
| DZ4480  | $\Delta$ <i>frzCD</i>                                                    | Codons 6-393   | Bustamante et al., 2004 |
| DZ4485  | <i>frzCD</i> <sup><math>\Delta</math>6-130</sup>                         |                | Mauriello et al., 2009  |
| DZ4743  | <i>frzCD</i> <sup><math>\Delta</math>6-130</sup> - <i>gfp</i>            |                | Mauriello et al., 2009  |
| EM231   | <i>frzCD</i> <sub>E202A-E203A</sub> :: <i>gfp</i>                        |                | Mauriello et al., 2009  |
| EM228   | <i>frzCD</i> <sub>E168A-G169A</sub> :: <i>gfp</i>                        |                | Mauriello et al., 2009  |
| EM434   | <i>frzE-mCherry</i>                                                      |                | This study              |
| EM506   | <i>frzE-mCherry</i> $\Delta$ <i>frzCD</i>                                |                | This study              |
| EM516   | <i>frzCD-gfp frzE::kan</i>                                               | Codons 171-438 | This study              |
| EM531   | <i>difA-gfp</i> $\Delta$ <i>parB/P</i> <sub>cuoA</sub> - <i>parB</i>     |                | This study              |
| EM532   | <i>frzCD-gfp</i> $\Delta$ <i>parB/P</i> <sub>cuoA</sub> - <i>parB</i>    |                | This study              |
| EM533   | <i>frzE-mCherry</i> $\Delta$ <i>parB/P</i> <sub>cuoA</sub> - <i>parB</i> |                | This study              |
| EM543   | <i>frzCD</i> <sup><math>\Delta</math>7-27</sup>                          | Codons 7-27    | This study              |
| EM550   | <i>frzCD</i> <sup><math>\Delta</math>7-27</sup> - <i>gfp</i>             | Codons 7-27    | This study              |
| TM26    | <i>frzS-yfp</i>                                                          |                | Guzzo et al., 2015      |
| EM622   | <i>frzCD</i> <sup><math>\Delta</math>6-130</sup> <i>frzS-yfp</i>         |                | This study              |
| EM623   | $\Delta$ <i>frzCD frzS-yfp</i>                                           |                | This study              |

3

4

5 Table S2: Plasmids used in this study

6

| Plasmid                                | Expression plasmid                                                                                    | Source             |
|----------------------------------------|-------------------------------------------------------------------------------------------------------|--------------------|
| pAH57                                  | <i>P</i> <sub>cuoA</sub> - <i>parB</i> , copper-dependent expression of <i>parB</i> , Mx8 attB        | Harms et al., 2013 |
| pAH18                                  | Construct for in frame deletion of <i>parB</i>                                                        | Harms et al., 2013 |
| pETPhos_ <i>frzCD</i>                  | pETPhos with <i>frzCD</i> tagged with 6-his inducible with IPTG                                       | Guzzo et al., 2015 |
| pETPhos_ <i>frzE</i> <sup>kinase</sup> | pETPhos with <i>frzE</i> <sup>CheA</sup> tagged with 6-his inducible with IPTG                        | Guzzo et al., 2015 |
| pETPhos_ <i>frzCD</i> <sup>c</sup>     | pETPhos with <i>frzCD</i> <sup>c</sup> tagged with 6-his inducible with IPTG                          | Guzzo et al., 2015 |
| pGEX(M)_ <i>frzA</i>                   | pETPhos with <i>frzA</i> tagged with 6-his inducible with IPTG                                        | Guzzo et al., 2015 |
| pEM365                                 | pBJ113 with <i>frzE-mCherry</i> fusion                                                                | This study         |
| pEM405                                 | pBJ113 with an insertion cassette for <i>frzE::kan</i>                                                | This study         |
| pEM418                                 | pBJ113 with a cassette for <i>frzCD</i> <sup><math>\Delta</math>7-27</sup>                            | This study         |
| pEM414                                 | pETPhos with <i>frzCD</i> <sup><math>\Delta</math>1-130</sup> tagged with 6-his inducible with IPTG   | This study         |
| pEM415                                 | pETPhos with <i>frzCD</i> <sup><math>\Delta</math>131-417</sup> tagged with 6-his inducible with IPTG | This study         |
| pEM433                                 | pETPhos with <i>frzCD</i> <sup><math>\Delta</math>7-27</sup> tagged with 6-his inducible with IPTG    | This study         |
| pEM409                                 | pETDuet-1 with <i>frzCD-gfp</i> inducible with IPTG                                                   | This study         |
| pEM417                                 | pETDuet-1 with <i>frzCD</i> <sup><math>\Delta</math>1-130</sup> - <i>gfp</i> inducible with IPTG      | This study         |
| pEM434                                 | pETDuet-1 with <i>frzCD</i> <sup><math>\Delta</math>7-27</sup> - <i>gfp</i> inducible with IPTG       | This study         |
| pEFrzsY                                | pEYFPN1 with a cassette to construct <i>frzS-yfp</i>                                                  | Guzzo et al., 2015 |
| pFCD-H6                                | pHis17 with <i>frzCD</i> gene tagged with a C-terminal 6-his                                          | This study         |

7

8

9 Table S3: Number of cells analyzed for Figure 5A

| Strain \ %IAA                                                    | 0   | 0.005 | 0.01 | 0.03 | 0.05 | 0.1 | 0.3 |
|------------------------------------------------------------------|-----|-------|------|------|------|-----|-----|
| <i>frzS-yfp</i>                                                  | 101 | 113   | 77   | 114  | 64   | 47  | 170 |
| <i>frzCD</i> <sup><math>\Delta</math>6-130</sup> <i>frzS-yfp</i> | 98  | 103   | 75   | 128  | 112  | 139 | 109 |
| $\Delta$ <i>frzCD frzS-yfp</i>                                   | 44  | ND    | ND   | ND   | 48   | ND  | 47  |

10

11

12

13

1 Table S4: DNA sequences used for EMSA in Figure 3 and Supplementary figure 4  
2

| Ds DNA     | Sequence (5' → 3')                                                                                                                                                                                                                                                                                                                                                                   | Length,<br>GC content (%) |
|------------|--------------------------------------------------------------------------------------------------------------------------------------------------------------------------------------------------------------------------------------------------------------------------------------------------------------------------------------------------------------------------------------|---------------------------|
| Oligo70    | CTTGCACTAGAGCTGACCATGATTACGCCATCAGCAGCTCCAGGTCGTAC<br>CTCCAGCTACCAATCCCCG                                                                                                                                                                                                                                                                                                            | 69, 57                    |
| Oligo340-1 | TAATACGACTCACTATAGGGAGACCACAACGGTTTCCCTCTAGAAATAAT<br>TTTGTTTAACTTTAAGAAGGAGATATACATATGTCCCTGGACACCCCCAA<br>CGAGAAGCCCGCTGGCAAGGCTCGCGCCCGGAAGCCCCCGCCTCCAAGG<br>CCGGCGCCACGAACGCGGCGTGCACCTCTTCCCTCCACCAAGGCCATCACC<br>GACACGCTGCTGACGGTGTGTCCGGCAACCTGCAGGCCCGCGTGCCCCAA<br>GGAGCTGGTCCGTGAGTCCGGCGTGGAGCTGGCGCACCTGCTCAACCAGG<br>TGCTGGACCAGTTCGCGGCCCTCCGAGCACCGCAAGCATG         | 339, 61                   |
| Oligo340-2 | GTTTAACTTTAAGAAGGAGATATACATATGAAAAAAGAAACGATTTTTTTC<br>CGAAGTAGAAACGGCTAACAGCAAGCAACTGGCTGTGTTGAAAGCTAATT<br>TCCCACAGTGTTTTGATAAAAAACGGAGCCTTCATTCAAGAAAAATTGCTT<br>GAGATTATTAGGGCATCGGAAGTTGAACCTCTCTAAAGAATCATAACAGCTT<br>GAACTGGCTGGGTAAATCTTATGCCCGTTTGTGGCCAATCTACCACCGA<br>AAACGTTGTTGGCAGAAGATAAAACTCATAACCAACAAGAAGAGAACAAG<br>AACAGTCAACACCTGTTAATCAAAGGGGATAATCTCGAAGTATTG | 345, 38                   |
| Oligo1300  | <i>frzCD</i> gene amplified with the primers<br>5'-ATGTCCCTGGACACCCCCAACGAGAAGCCCGCTGG-3' and<br>5'-CTAGTCGGCCTTGAACCGCTTGATGAGCTCGGCCA-3' and the<br>plasmid pFCD-H6 as template                                                                                                                                                                                                    | 1254, 70                  |
| Oligo801   | Fragment amplified with the primers<br>5'-cgggatcctggctccgccccgacgca-3' and<br>5'-cccaagcttttgatgaggcgcttgagat-3'<br>and DZ2 chromosomal DNA as template                                                                                                                                                                                                                             | 801, 68                   |

3

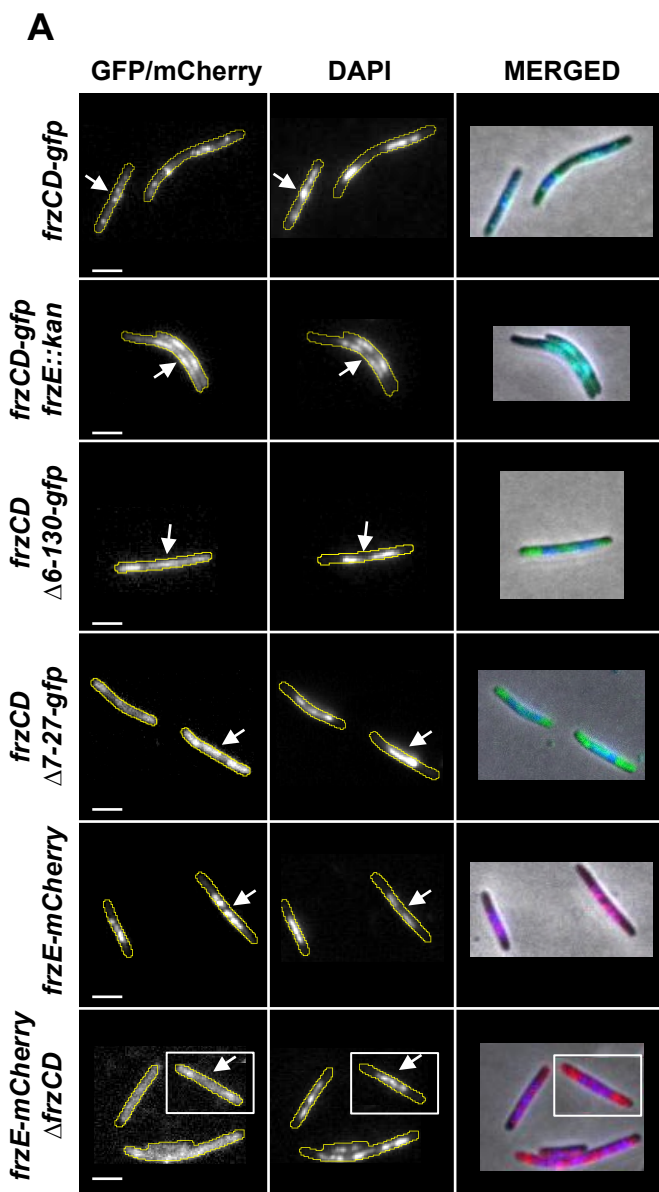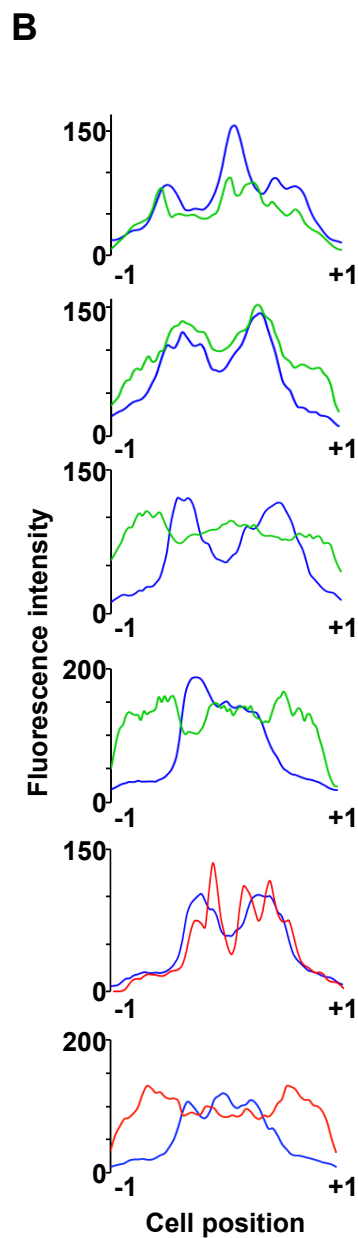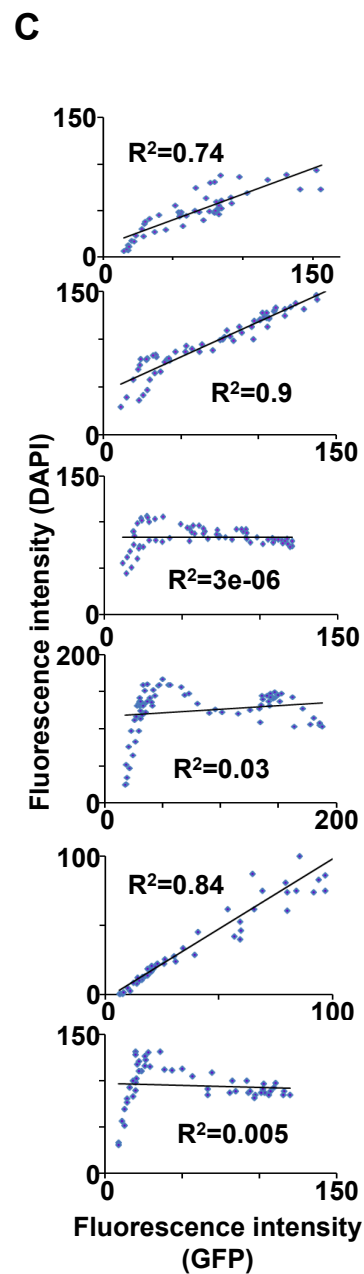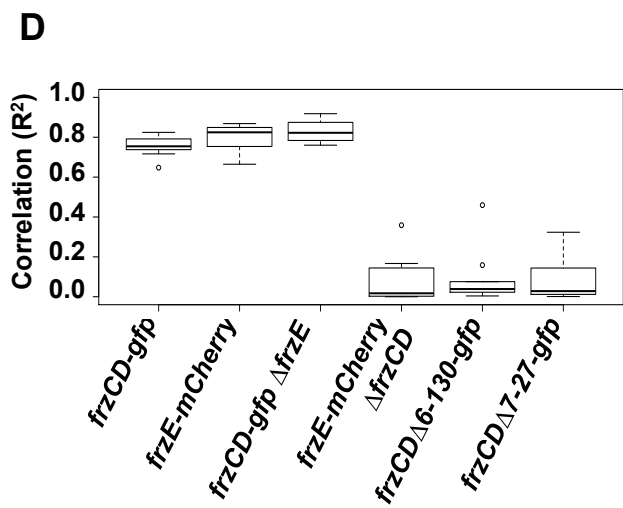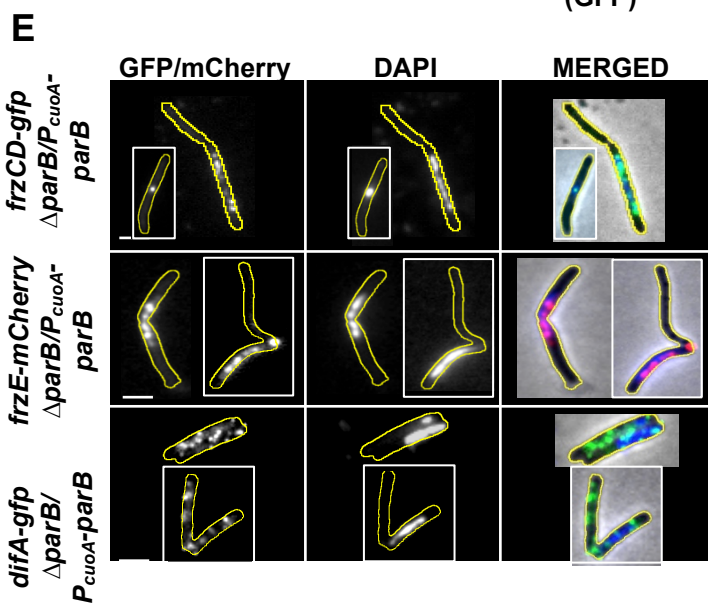

GFP/mCherry

DAPI

Brightfield

*frzCD-gfp*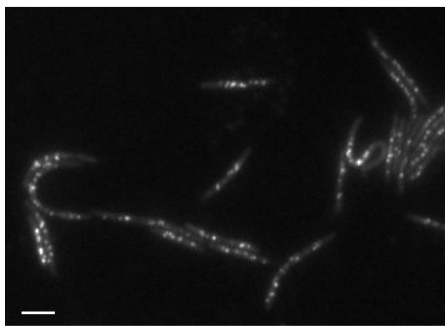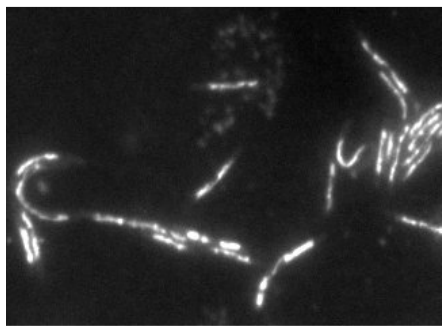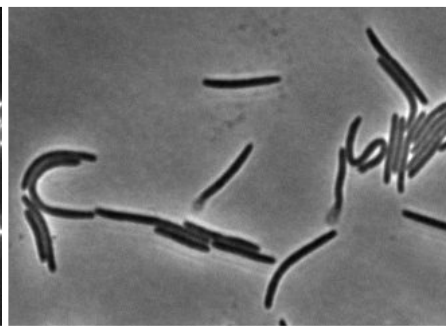*frzCD-gfp*  
*frzE::kan*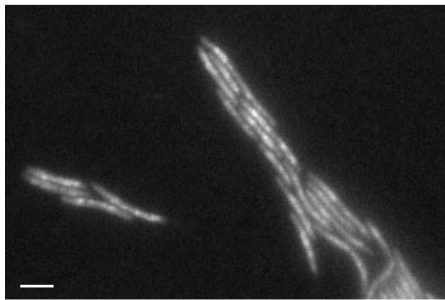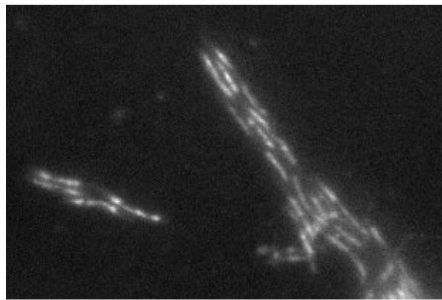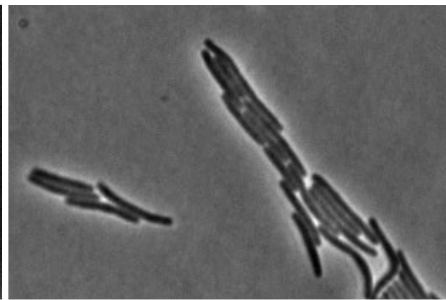*frzCD*  
 $\Delta$ 6-130-gfp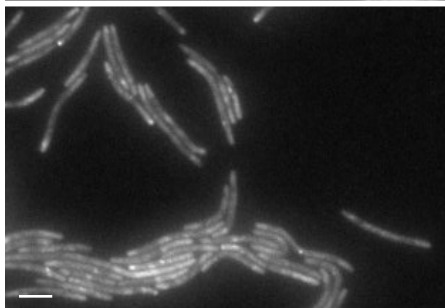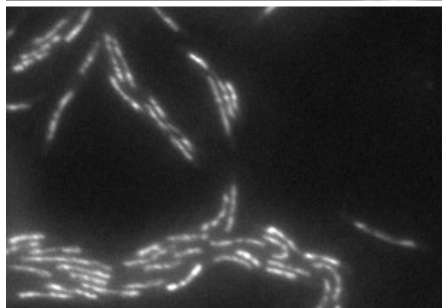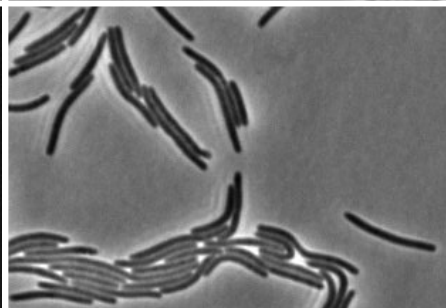*frzCD*  
 $\Delta$ 7-27-gfp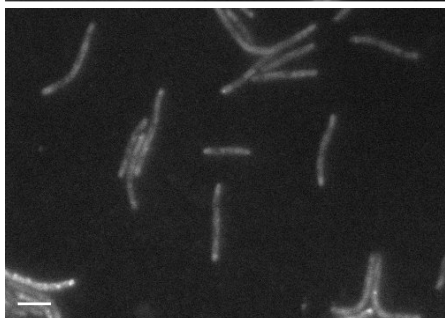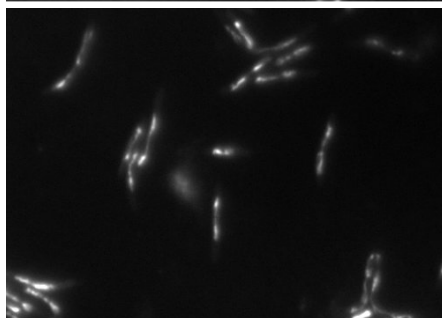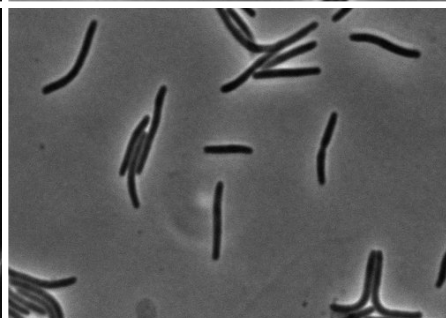*frzE-mCherry*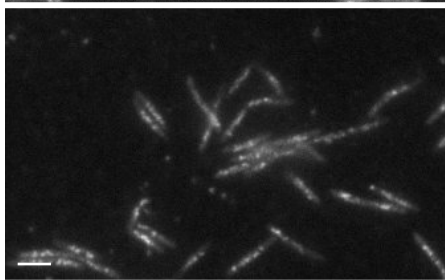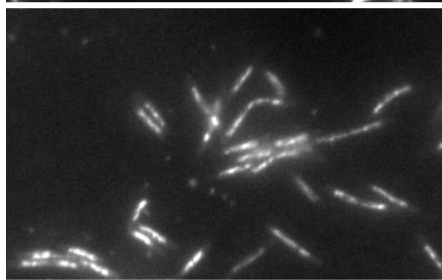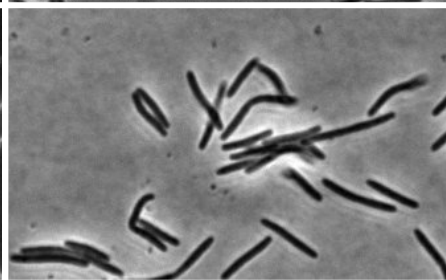*frzE-mCherry*  
 $\Delta$ *frzCD*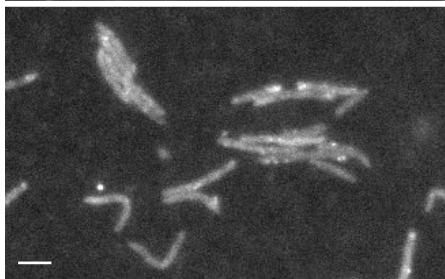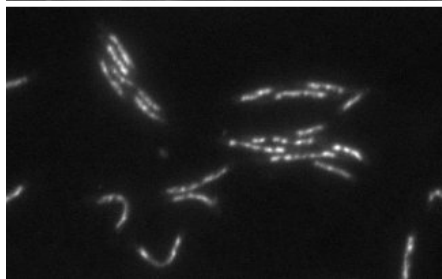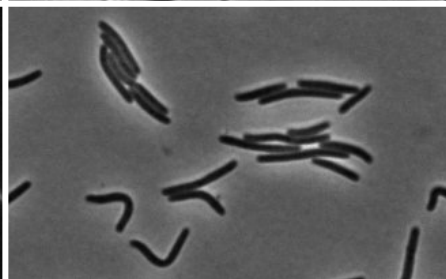



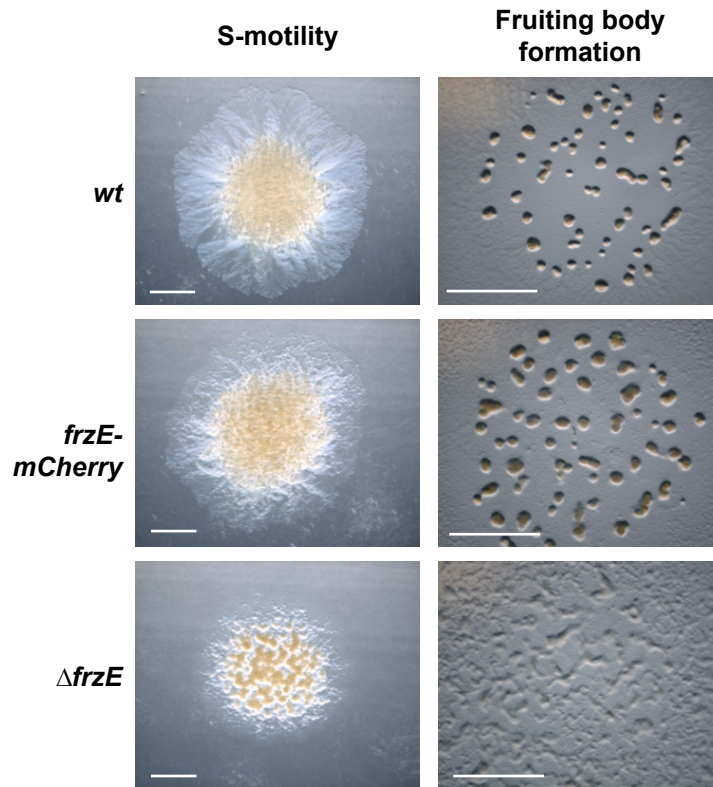

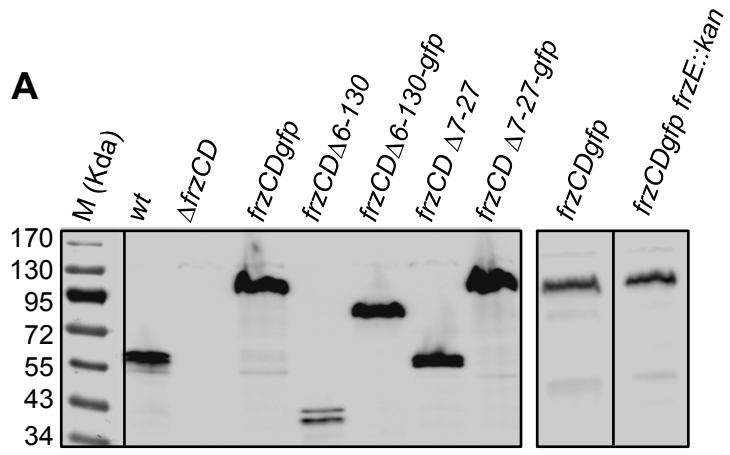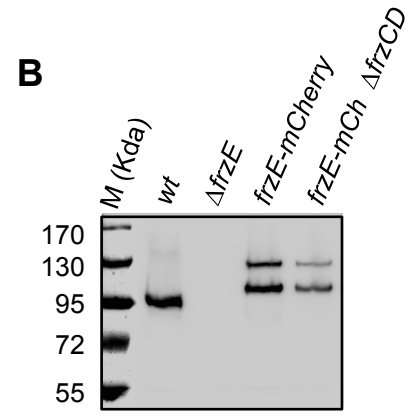

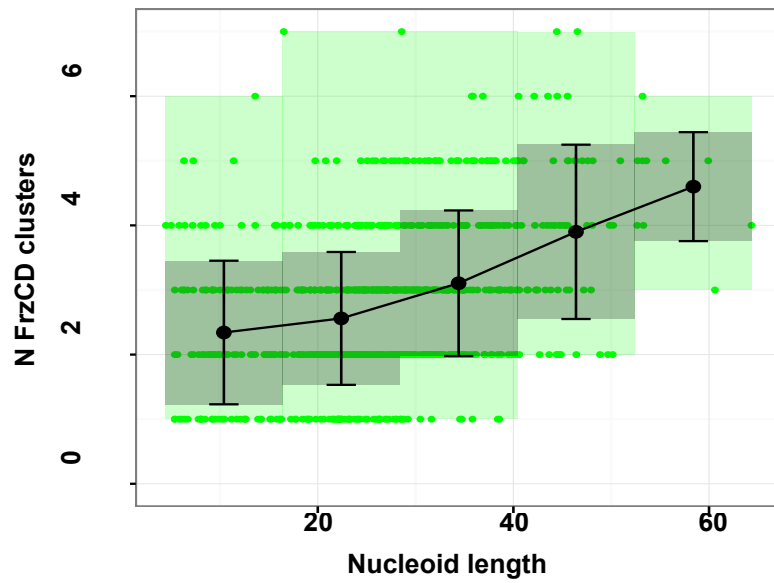

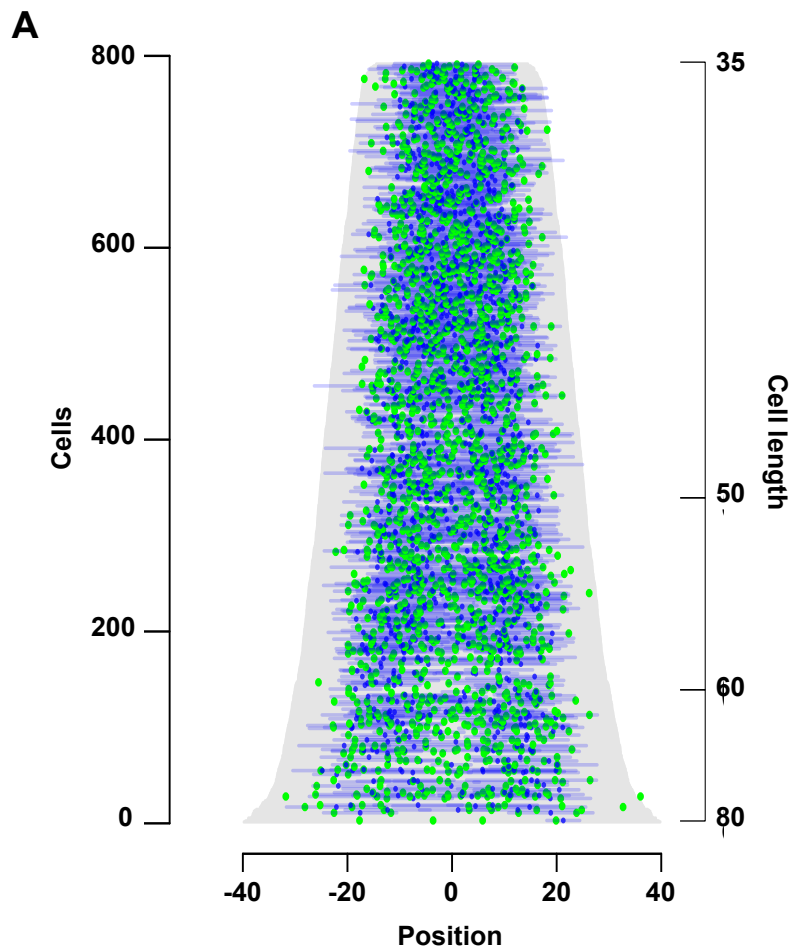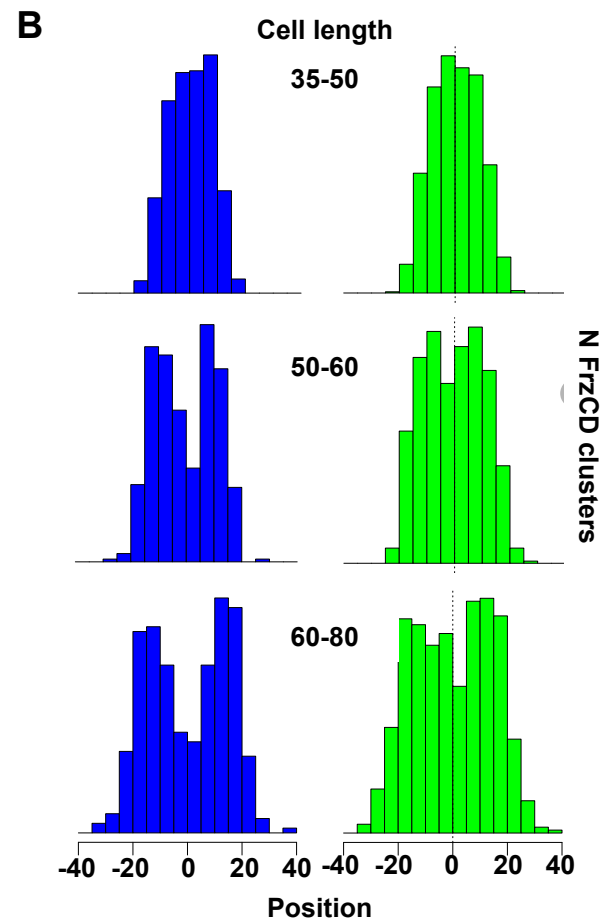

**A**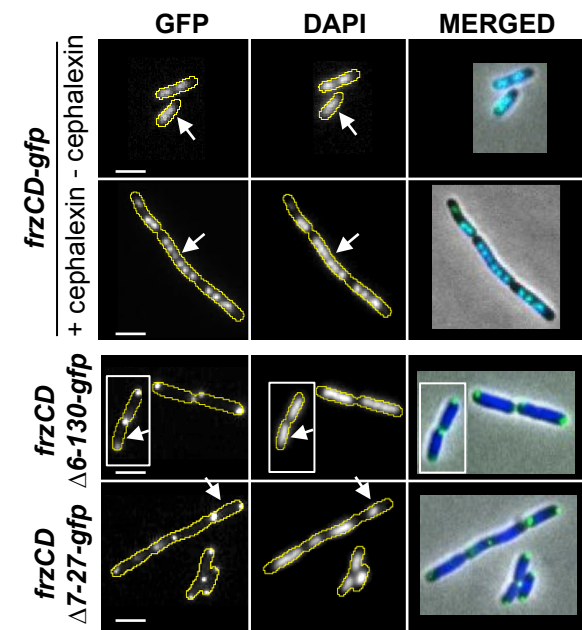**B**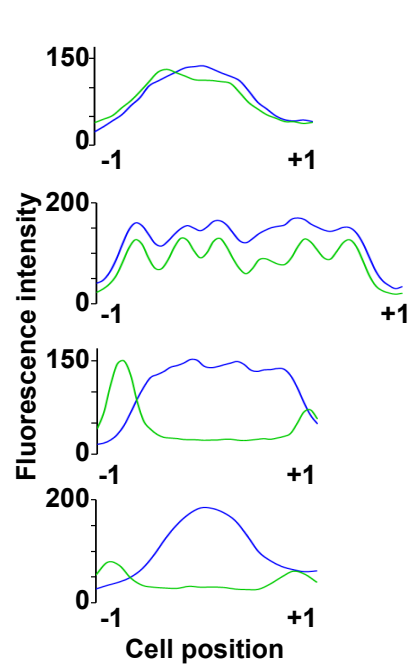**C**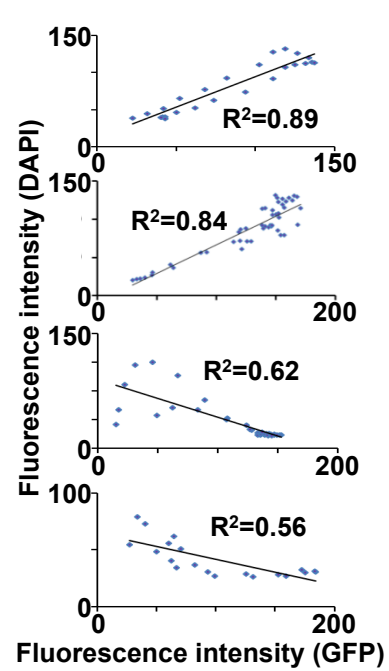**D**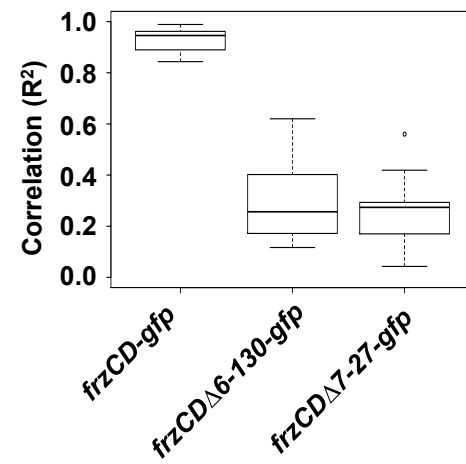

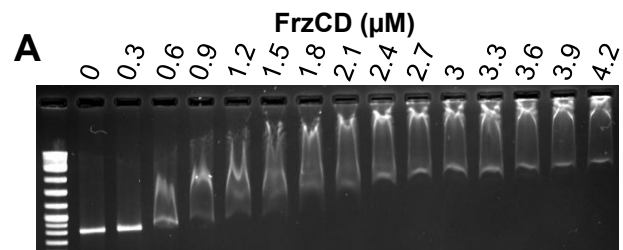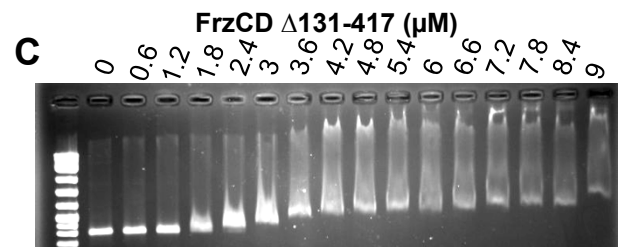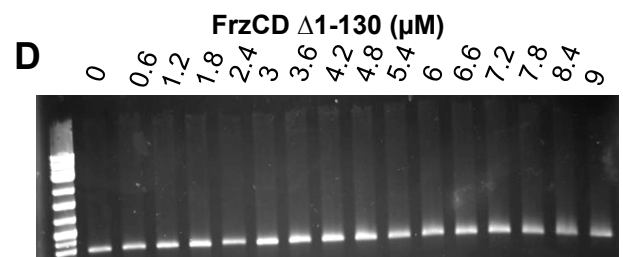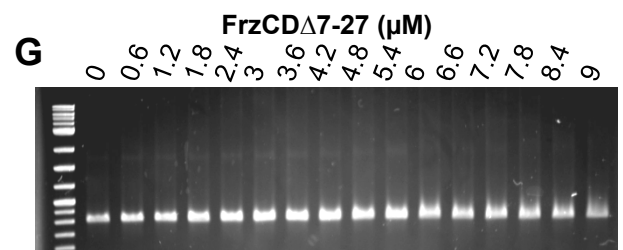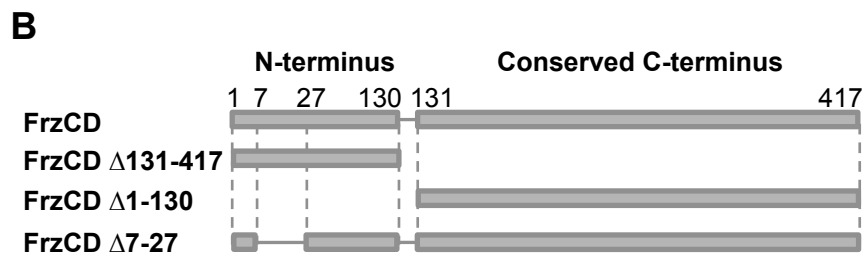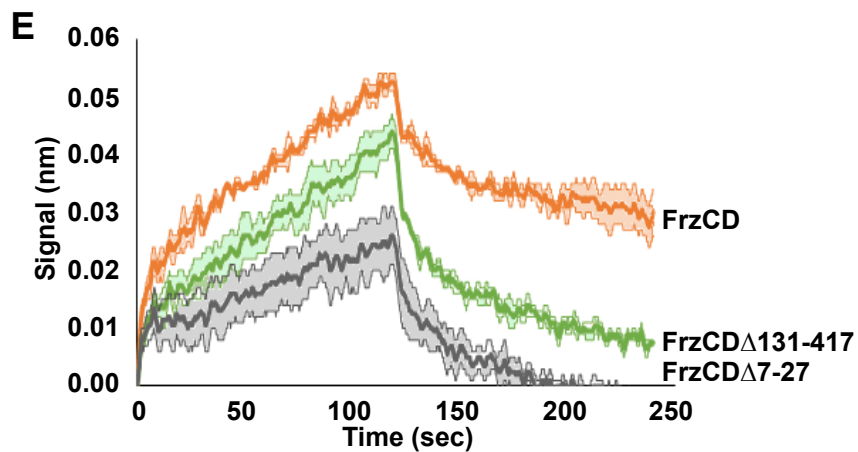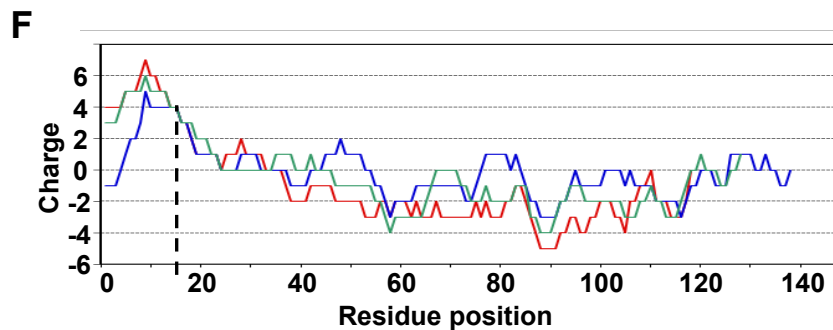

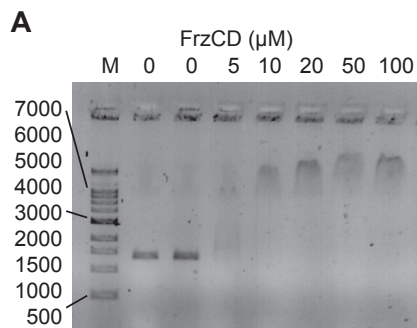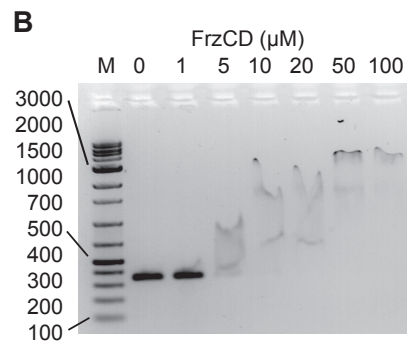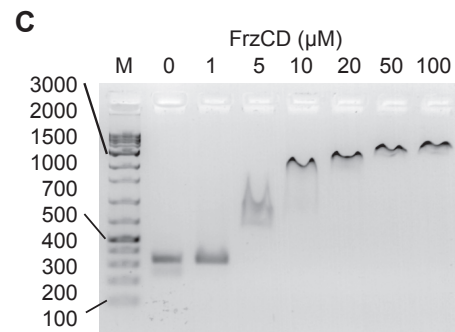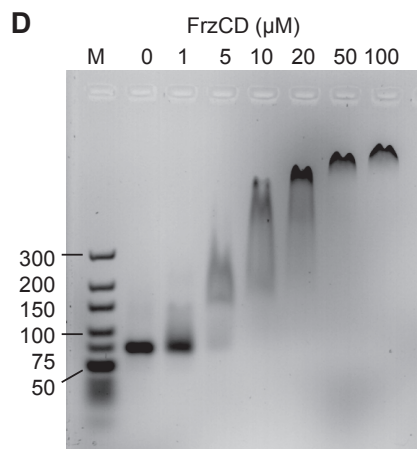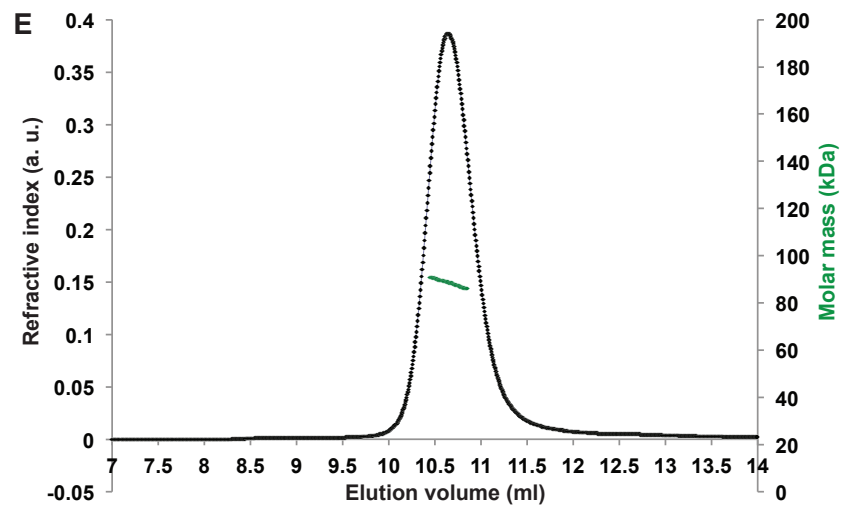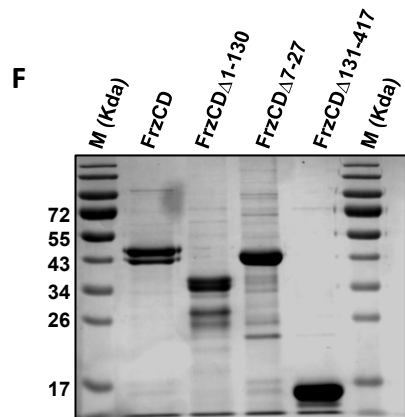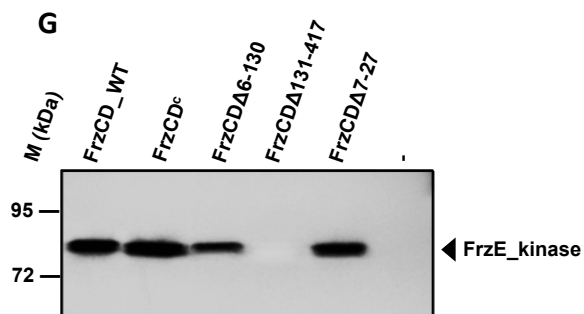

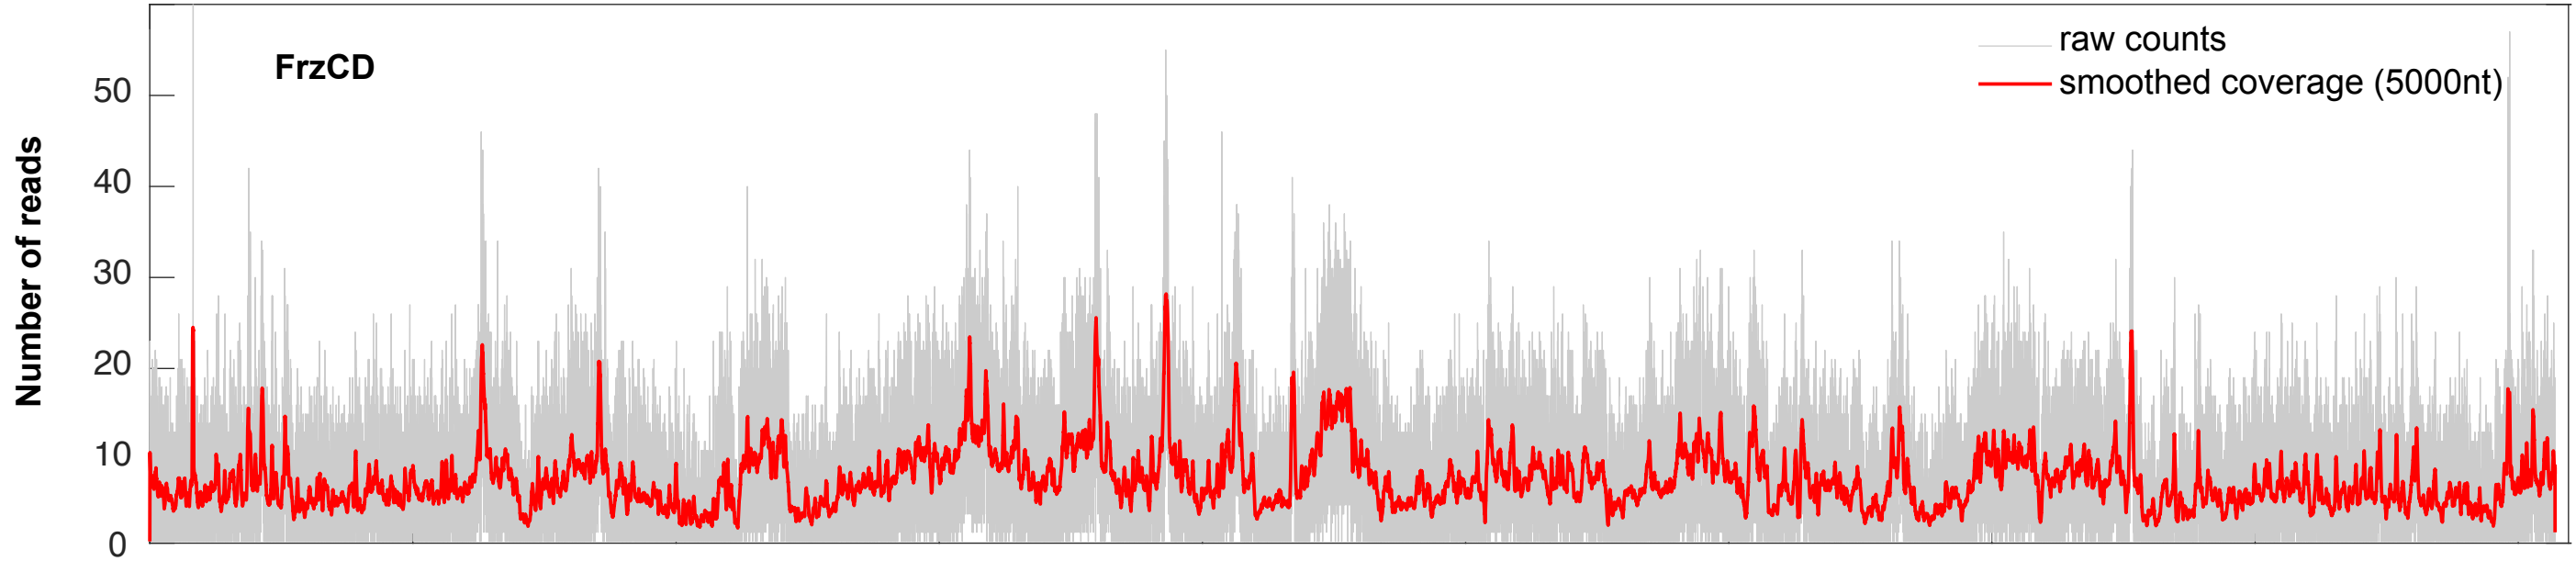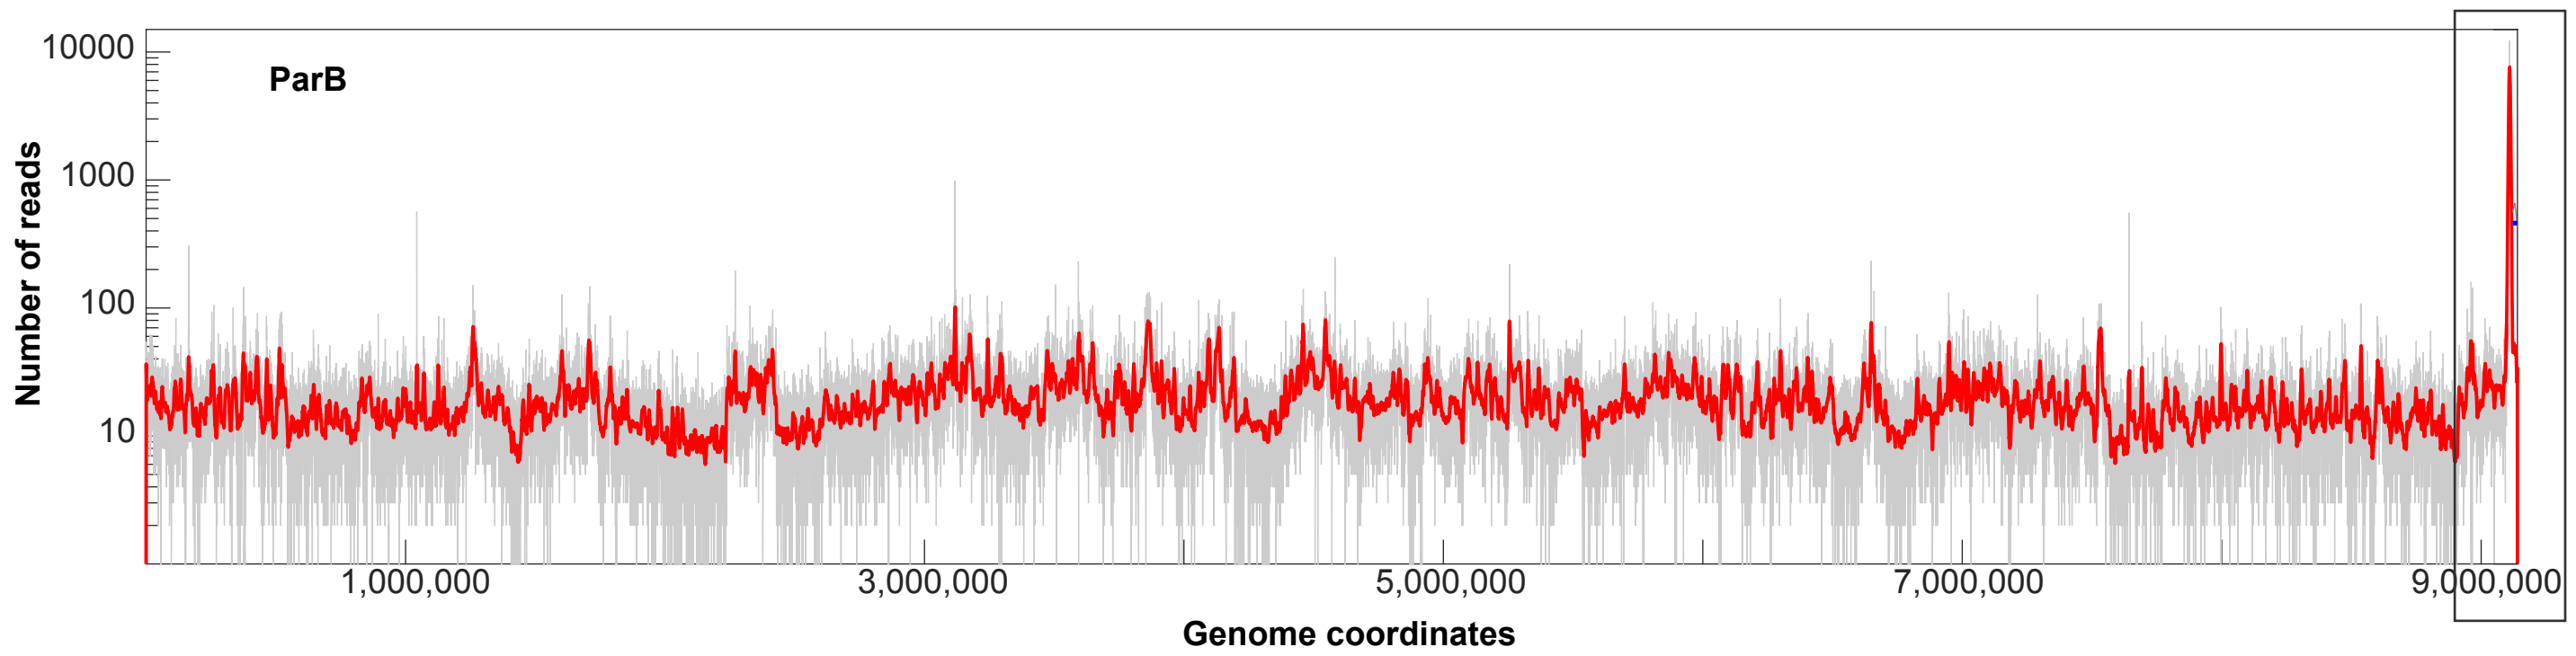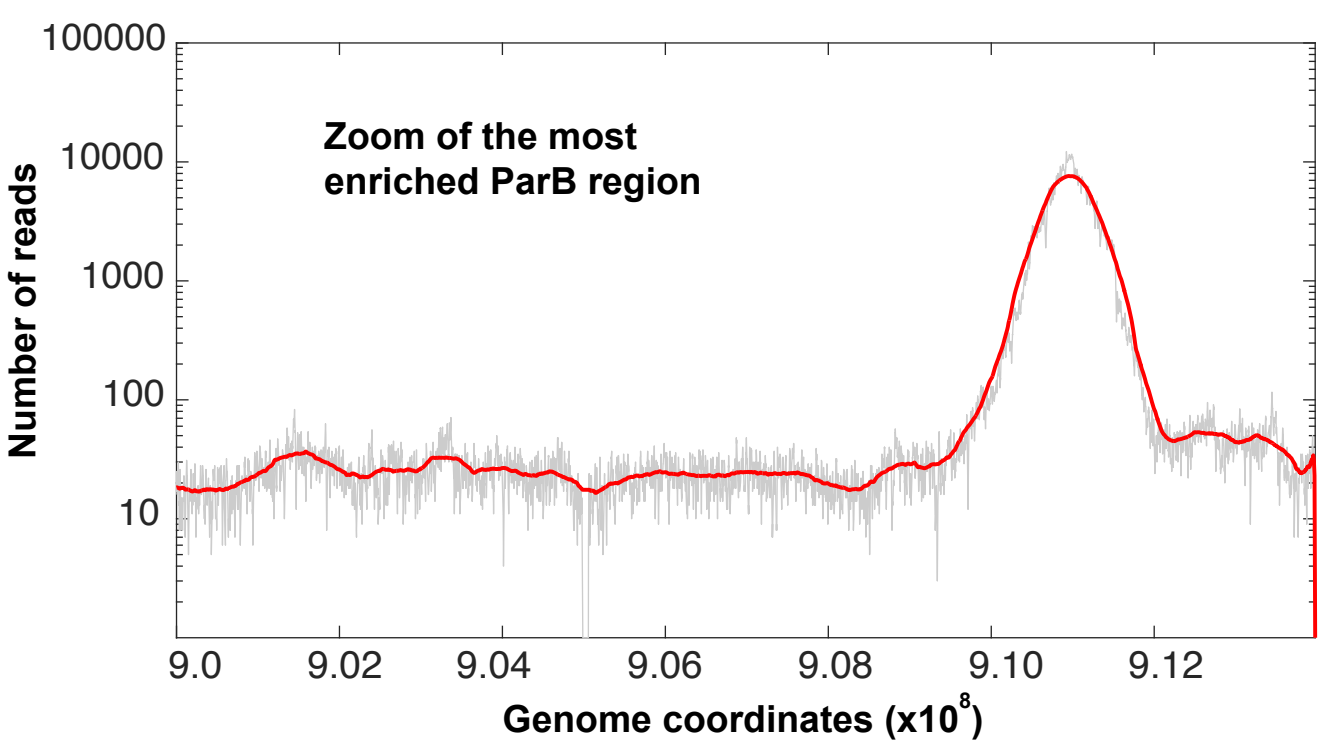





basic acid NQS polar AGPTC borderline ILLMVFWY hydrophobic H histidine

Myxococcus xanthus
Myxococcus virescens
Myxococcus hansupus
Myxococcus fulvus
Myxococcus stipitatus
Corallocooccus coralloides
Archangium sp. Cb G35
Hyalangium minutum
Cystobacter ferrugineus
Archangium violaceum
Stigmatella aurantiaca
Cystobacter fuscus
Anaeromyxobacter sp. Fw109-5
Anaeromyxobacter sp.

Myxococcus xanthus
Myxococcus virescens
Myxococcus hansupus
Myxococcus fulvus
Myxococcus stipitatus
Corallocooccus coralloides
Archangium sp. Cb G35
Hyalangium minutum
Cystobacter ferrugineus
Archangium violaceum
Stigmatella aurantiaca
Cystobacter fuscus
Anaeromyxobacter sp. Fw109-5
Anaeromyxobacter sp.

Myxococcus xanthus
Myxococcus virescens
Myxococcus hansupus
Myxococcus fulvus
Myxococcus stipitatus
Corallocooccus coralloides
Archangium sp. Cb G35
Hyalangium minutum
Cystobacter ferrugineus
Archangium violaceum
Stigmatella aurantiaca
Cystobacter fuscus
Anaeromyxobacter sp. Fw109-5
Anaeromyxobacter sp.

Myxococcus xanthus
Myxococcus virescens
Myxococcus hansupus
Myxococcus fulvus
Myxococcus stipitatus
Corallocooccus coralloides
Archangium sp. Cb G35
Hyalangium minutum
Cystobacter ferrugineus
Archangium violaceum
Stigmatella aurantiaca
Cystobacter fuscus
Anaeromyxobacter sp. Fw109-5
Anaeromyxobacter sp.

Myxococcus xanthus
Myxococcus virescens
Myxococcus hansupus
Myxococcus fulvus
Myxococcus stipitatus
Corallocooccus coralloides
Archangium sp. Cb G35
Hyalangium minutum
Cystobacter ferrugineus
Archangium violaceum
Stigmatella aurantiaca
Cystobacter fuscus
Anaeromyxobacter sp. Fw109-5
Anaeromyxobacter sp.

Myxococcus xanthus
Myxococcus virescens
Myxococcus hansupus
Myxococcus fulvus
Myxococcus stipitatus
Corallocooccus coralloides
Archangium sp. Cb G35
Hyalangium minutum
Cystobacter ferrugineus
Archangium violaceum
Stigmatella aurantiaca
Cystobacter fuscus
Anaeromyxobacter sp. Fw109-5
Anaeromyxobacter sp.

Myxococcus xanthus
Myxococcus virescens
Myxococcus hansupus
Myxococcus fulvus
Myxococcus stipitatus
Corallocooccus coralloides
Archangium sp. Cb G35
Hyalangium minutum
Cystobacter ferrugineus
Archangium violaceum
Stigmatella aurantiaca
Cystobacter fuscus
Anaeromyxobacter sp. Fw109-5
Anaeromyxobacter sp.

Myxococcus xanthus
Myxococcus virescens
Myxococcus hansupus
Myxococcus fulvus
Myxococcus stipitatus
Corallocooccus coralloides
Archangium sp. Cb G35
Hyalangium minutum
Cystobacter ferrugineus
Archangium violaceum
Stigmatella aurantiaca
Cystobacter fuscus
Anaeromyxobacter sp. Fw109-5
Anaeromyxobacter sp.

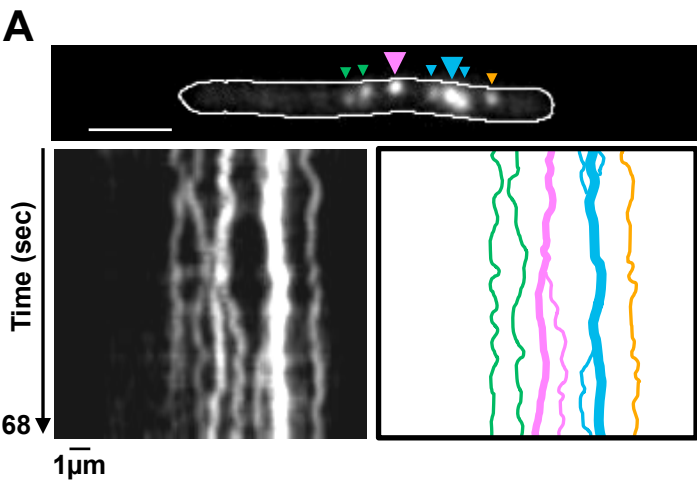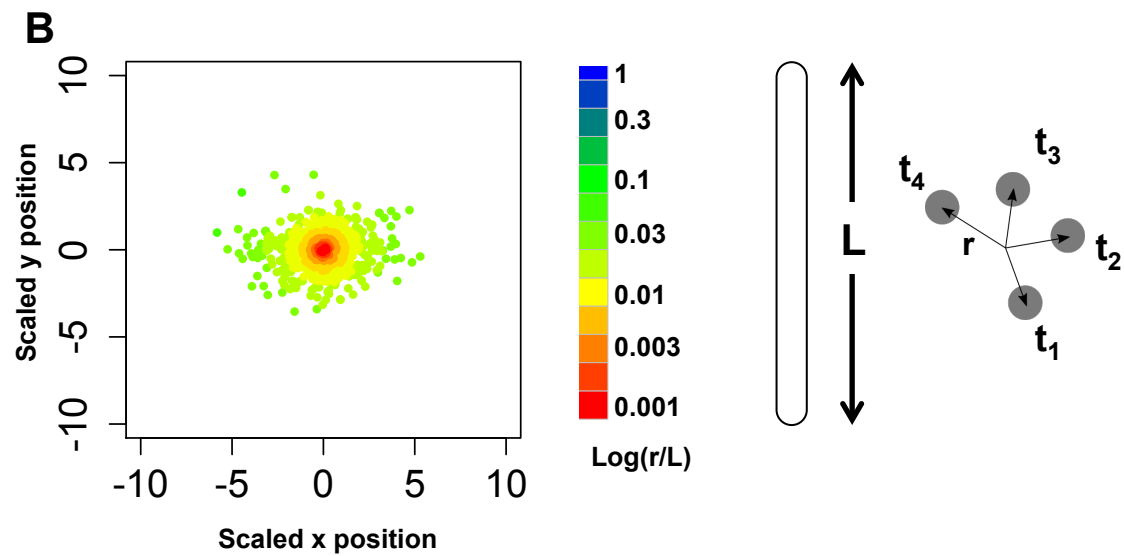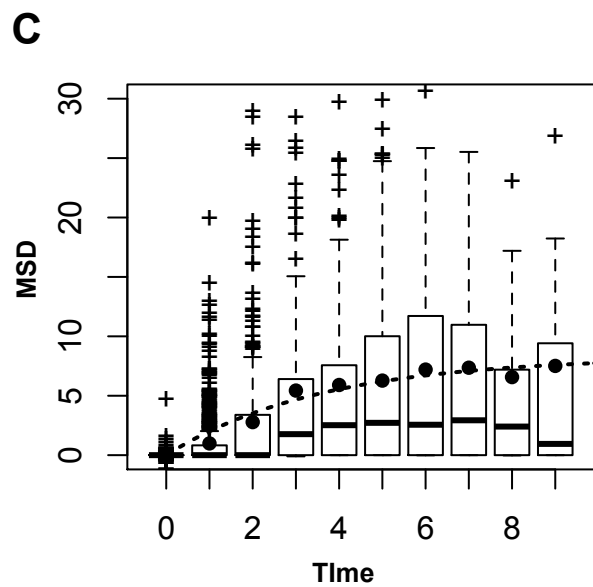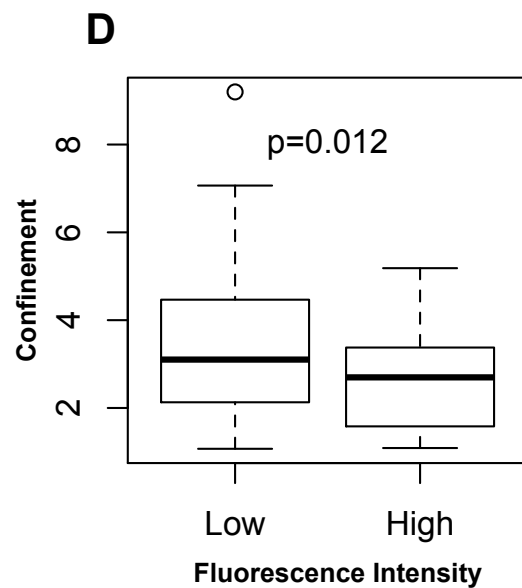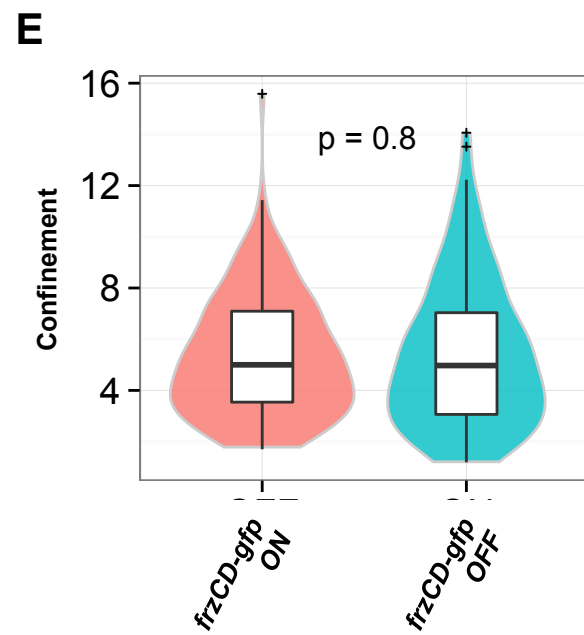

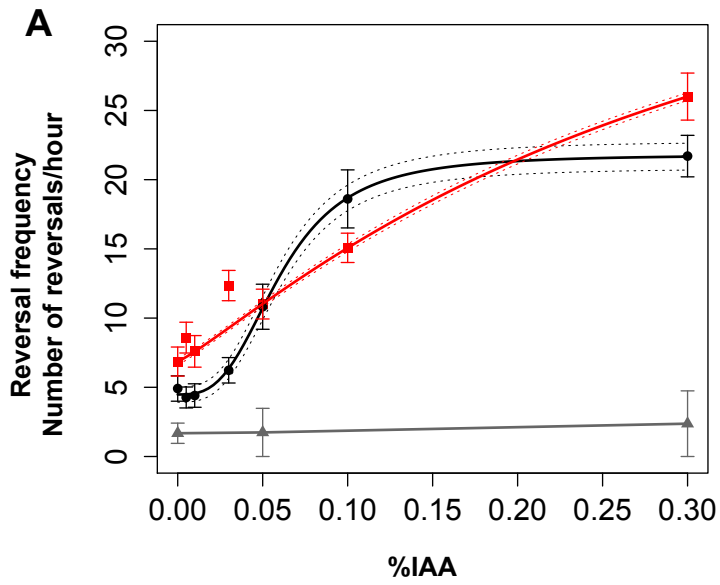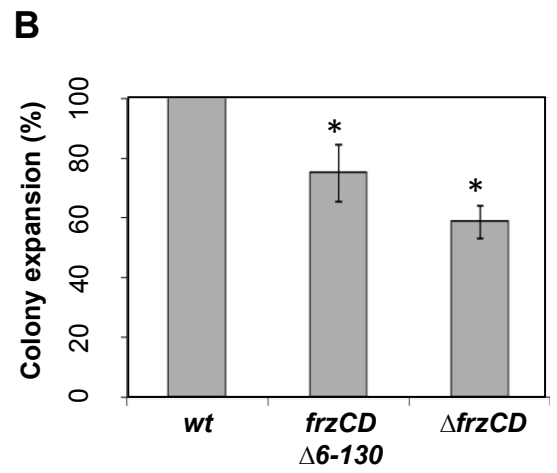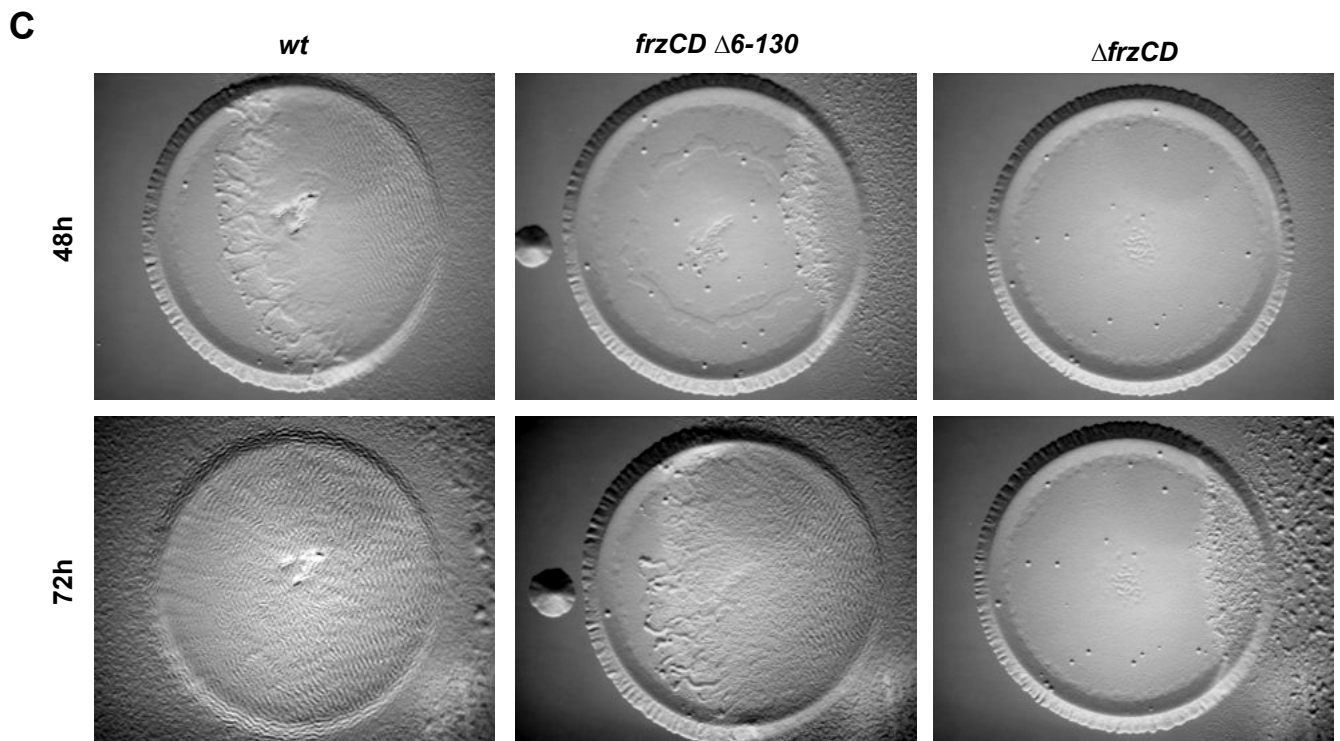

Source: https://www.biorxiv.org/content/10.1101/169912v2.full.pdf
